# Supplementary material for: Development of Dicationic Bisguanidine-Arylfuran Derivatives as Potent Agents against Gram-Negative Bacteria
Source: MDPI journal article supplement (doi:10.3390/antibiotics11081115), 2022-08-17

## Supporting Information

# Development of Dicationic Bisguanidine-arylfuran Derivatives as Potent Agents Against Gram-negative Bacteria

Catarina Bourgard<sup>1,2†</sup>, Diego Rodríguez-Hernández<sup>1†</sup>, Anastasia Rudenko<sup>1,2</sup>, Carolin Rutgersson<sup>2,3</sup>, Martin Palm<sup>1,2</sup>, D.G. Joakim Larsson<sup>2,3</sup>, Anne Farewell<sup>1,2</sup>, Morten Grøtli<sup>1,\*</sup> and Per Sunnerhagen<sup>1,2,\*</sup>

<sup>1</sup> Department of Chemistry and Molecular Biology, University of Gothenburg, S-405 30 Gothenburg, Sweden.

<sup>2</sup> Centre for Antibiotic Resistance Research (CARE), University of Gothenburg, S-405 30 Gothenburg, Sweden.

<sup>3</sup> Institute of Biomedicine, Department of Infectious Diseases, University of Gothenburg, S-413 46 Gothenburg, Sweden.

<sup>†</sup> These authors contributed equally to this work.

<sup>\*</sup> Correspondence authors: grotli@chem.gu.se (M.G.); per.sunnerhagen@cmb.gu.se (P.S.)

## Table of Contents

|                                                                                                                                                                                                                                                                                |    |
|--------------------------------------------------------------------------------------------------------------------------------------------------------------------------------------------------------------------------------------------------------------------------------|----|
| 1. Scheme S1. Synthetic pathway to <b>1</b> , <b>3-9a</b> .....                                                                                                                                                                                                                | 3  |
| 2. Scheme S2. Synthetic pathway to <b>10a</b> .....                                                                                                                                                                                                                            | 3  |
| 3. Scheme S3. Synthetic pathway to <b>11-14a</b> .....                                                                                                                                                                                                                         | 3  |
| 4. Scheme S4. Synthetic pathways to <b>16-20a</b> .....                                                                                                                                                                                                                        | 4  |
| 5. Table S1. Effective concentrations of each compound against the Gram-negative and Gram-positive set of laboratory strains .....                                                                                                                                             | 5  |
| 6. Table S2. Selectivity indexes of each compound against the Gram-negative and Gram-positive set of laboratory strains.....                                                                                                                                                   | 6  |
| 7. Table S3. MIC values of established antibiotics for the clinical isolates of ESKAPE species and <i>E. coli</i> tested in this paper .....                                                                                                                                   | 7  |
| 8. Table S4. Genomic G/C content (%) of bacterial species .....                                                                                                                                                                                                                | 7  |
| 9. Figure S1. Cytotoxicity dose-response curves of all compounds against MCF-7 (A, B and C) and HepG2 (D, E and F) cell lines.....                                                                                                                                             | 8  |
| 10. Figure S2. Antibacterial activity dose-response curves of all compounds against Gram-negative <i>E. coli</i> (A, B and C), <i>P. putida</i> (D, E and F), <i>P. carotovorum</i> (G, H and I) and <i>P. caledonica</i> (J, K and L) .....                                   | 8  |
| 11. Figure S3. Antibacterial activity dose-response curves of all compounds against Gram-positive <i>B. subtilis</i> (A, B and C) .....                                                                                                                                        | 9  |
| 12. Figure S4. Measurements of the antibacterial activity of ampicillin, as a positive control antibiotic tested against Gram-negative <i>Escherichia coli</i> (A) and Gram-positive <i>Bacillus subtilis</i> (B).....                                                         | 10 |
| 13. Figure S5. Antibacterial activity dose-response curves of <b>1</b> against the 10 Gram-negative bacteria .....                                                                                                                                                             | 10 |
| 14. Figure S6. Antibacterial activity dose-response curves of <b>3</b> against the 10 Gram-negative bacteria .....                                                                                                                                                             | 11 |
| 15. Figure S7. Antibacterial activity dose-response curves of <b>4</b> against the 10 Gram-negative bacteria .....                                                                                                                                                             | 11 |
| 16. Figure S8. Antibacterial activity dose-response curves of <b>6</b> against the 10 Gram-negative bacteria .....                                                                                                                                                             | 12 |
| 17. Figure S9. Antibacterial activity dose-response curves of <b>8</b> against the 10 Gram-negative bacteria .....                                                                                                                                                             | 12 |
| 18. Figure S10. Antibacterial activity dose-response curves of <b>10</b> against the 10 Gram-negative bacteria .....                                                                                                                                                           | 13 |
| 19. Figure S11. Antibacterial activity dose-response curves of <b>16</b> against the 10 Gram-negative bacteria .....                                                                                                                                                           | 13 |
| 20. Figure S12. Antibacterial activity dose-response curves of <b>17</b> against the 10 Gram-negative bacteria .....                                                                                                                                                           | 14 |
| 21. Figure S13. Antibacterial activity dose-response curves of the known antibiotic cefotaxime (CTX) as a control against the 10 Gram-negative bacteria .....                                                                                                                  | 14 |
| 22. Figure S14. High-resolution microbial phenomics profiling of the synthesized compounds <b>1</b> (A), <b>4</b> (B), <b>6</b> (C), <b>10</b> (D), and <b>16</b> (E), and the known antibiotic cefotaxime (F), against two <i>E. coli</i> antibiotic resistant libraries..... | 15 |
| 23. Figures S15-S32. NMR spectra .....                                                                                                                                                                                                                                         | 16 |

## SUPPLEMENTARY SCHEMES

**Scheme S1.** Synthetic pathway to **1**, **3-9<sup>a</sup>**.

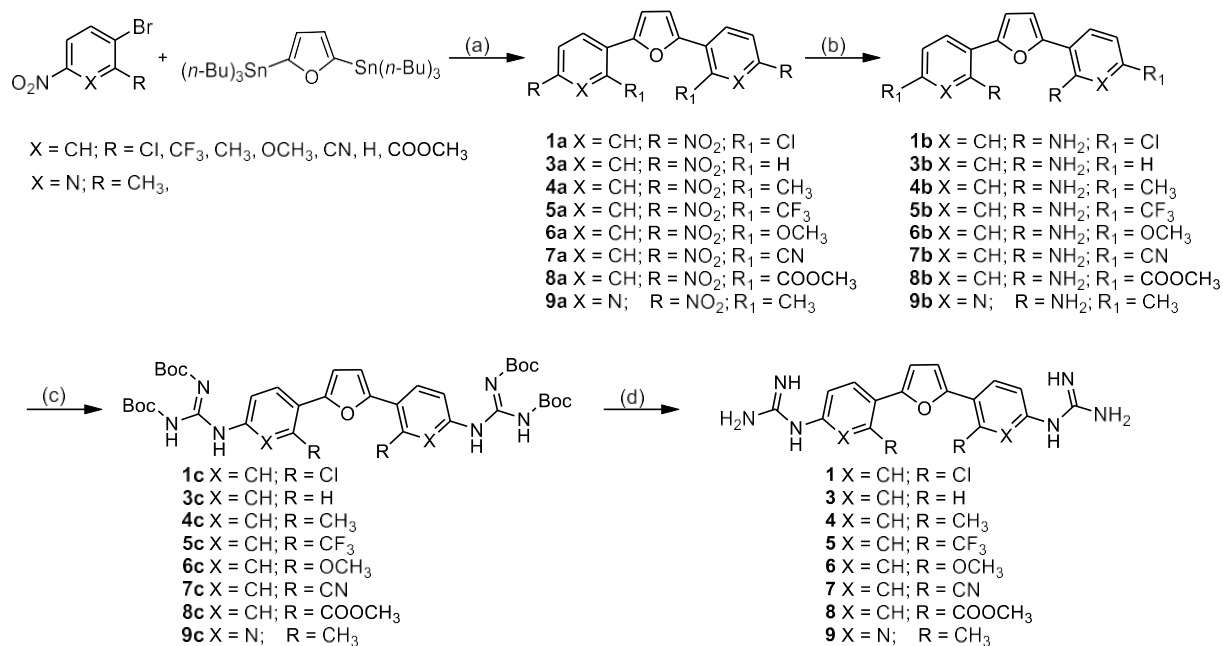

<sup>a</sup>Reagents and conditions: (a)  $\text{Pd}(\text{PPh}_3)_4$ , DMF, 100 °C, 14 h, 46-80%; (b) Fe,  $\text{NH}_4\text{Cl}$ , EtOH, THF, 60 °C, 4 h, 75-95%; (c) 1,3-bis(*tert*-butoxycarbonyl)-2-methyl-2-thiopseudourea,  $\text{HgCl}_2$ , TEA, DMF, rt, 16 h, 93-95%; (d) 4 M HCl in Dioxane, rt, 12 h, 86-90%.

**Scheme S2.** Synthetic pathway to **10<sup>a</sup>**.

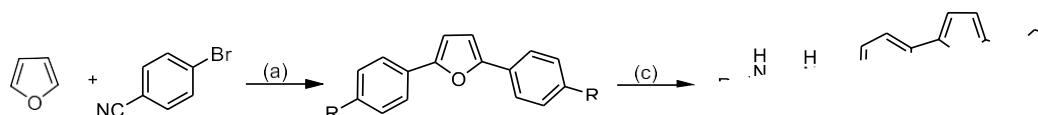

<sup>a</sup>Reagents and conditions: (a)  $\text{Pd}(\text{OAc})_2$ , KOAc, DMA, 150 °C, 20 h, 29%; (b) LAH, THF, rt, 24 h, 60%; (c) 1,3-bis(*tert*-butoxycarbonyl)-2-methyl-2-thiopseudourea,  $\text{HgCl}_2$ , TEA, DMF, rt, 16 h, 76%; (d) 4 M HCl in Dioxane, rt, 12 h, 79%.

**Scheme S3.** Synthetic pathway to **11-14<sup>a</sup>**.

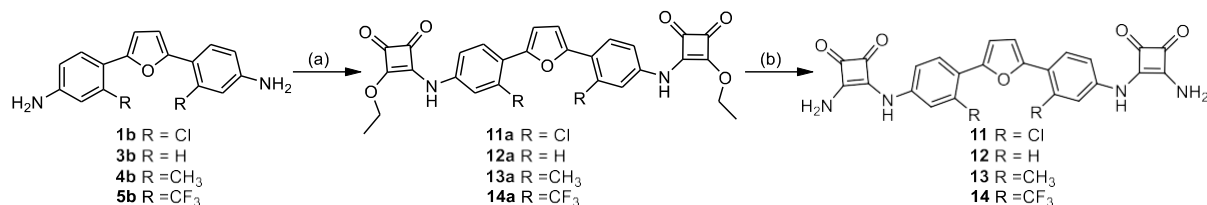

<sup>a</sup>Reagents and conditions: (a) 3,4-diethoxycyclobut-3-ene-1,2-dione,  $(\text{Zn}(\text{OTf})_2)$ , EtOH, rt, 4 h, 36-75%; (b)  $\text{NH}_3$  in MeOH 7M, MeOH, rt, 4 h, 52-77%.

**Scheme S4.** Synthetic pathways to **16-20**<sup>a</sup>.

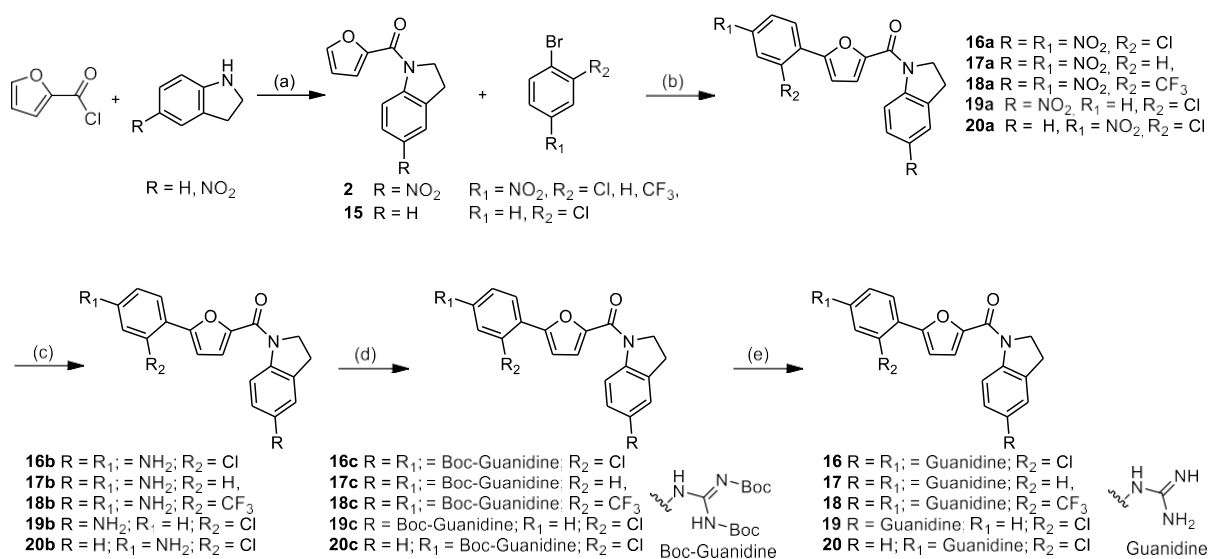

<sup>a</sup>Reagents and conditions: (a) TEA, DCM, rt, 4 h, 50%; (b) Pd(OAc)<sub>2</sub>, KOAc, DMA, 150 °C, 20 h, 43-50%; (c) Fe, NH<sub>4</sub>Cl, EtOH, THF, 60 °C, 4 h, 75-84%; (d) 1,3-bis(*tert*-butoxycarbonyl)-2-methyl-2-thiopseudourea, HgCl<sub>2</sub>, TEA, DMF, rt, 16 h, 21-45%; (e) 4 M HCl in Dioxane, rt, 12 h, 35-86%.

## SUPPLEMENTARY TABLES

**Table S1.** Effective concentrations of each compound against the Gram-negative and Gram-positive set of laboratory strains.

| Structure | #  | Bsu   |       | Eco   |       | Ppu   |       | Pcar  |       | Pcal  |       |
|-----------|----|-------|-------|-------|-------|-------|-------|-------|-------|-------|-------|
|           |    | EC50  | EC90  |
|           | 1  | 25.4  | 136.1 | 64.8  | 148.2 | 257.8 | 517.1 | 67.1  | 114.9 | 20.3  | 135.9 |
|           | 3  | 11.2  | 22.5  | 80.4  | 173.8 | 8.3   | 14.3  | 34.6  | 79.0  | 4.5   | 18.9  |
|           | 4  | 6.2   | 8.5   | 48.9  | 80.8  | 14.5  | 59.6  | 28.6  | 37.3  | 8.2   | 51.9  |
|           | 5  | NE    | NE    | 29.4  | 59.1  | 290.3 | 319.1 | 184.9 | 233.2 | NE    | NE    |
|           | 6  | NE    | NE    | 35.7  | 76.3  | 14.3  | 19.7  | 28.4  | 45.0  | 25.6  | 35.6  |
|           | 7  | 146.2 | 562.5 | 59.33 | 349.7 | 24.5  | 51.5  | 212.3 | 268.1 | NE    | NE    |
|           | 8  | 22.5  | 43.6  | 95.4  | 128.6 | 68.4  | 92.1  | 140.0 | 157.5 | NE    | NE    |
|           | 9  | 154.2 | 245.8 | 547.3 | >900  | NE    | NE    | NE    | NE    | 84.8  | 212.6 |
|           | 10 | NE    | NE    | 73.2  | 108.4 | 25.6  | 36.7  | 43.6  | 61.2  | 2.9   | 5.0   |
|           | 11 | NE    | 19.0  | 60.1  |
|           | 12 | NE    |
|           | 13 | NE    |
|           | 14 | NE    | 90.4  | 304.9 |
|           | 16 | NE    | NE    | 13.1  | 19.0  | 94.2  | 147.0 | 70.9  | 80.7  | 51.4  | 175.6 |
|           | 17 | NE    | NE    | 1.7   | 4.3   | 73.9  | 98.0  | 129.9 | 142.4 | 72.5  | >300  |
|           | 18 | 9.6   | 13.6  | 42.3  | 58.3  | 10.1  | 22.2  | 94.6  | 120.2 | 12.6  | 176.0 |
|           | 19 | 14.5  | 25.9  | 0.5   | 2.5   | 75.0  | 84.9  | 87.1  | 130.1 | 96.3  | 287.0 |
|           | 20 | 24.5  | 38.4  | 61.7  | 105.8 | NE    | NE    | 158.9 | 186.6 | 129.4 | >300  |

Half maximal effective concentration (EC50) and 90% maximal effective concentration (EC90) are expressed in  $\mu\text{M}$  for each compound. Values >900 and >300  $\mu\text{M}$  represent the maximum compound concentration tested in the assays, without observing a 50% or 90% inhibition. NE, No effective concentration observed. Tested organisms were *B. subtilis* (Bsu); *E. coli* (Eco); *P. putida* (Ppu); *P. carotovorum* (Pcar); *P. caledonica* (Pcal).

**Table S2.** Selectivity indexes of each compound against the Gram-negative and Gram-positive set of laboratory strains.

| Code | <i>B. subtilis</i> | <i>E. coli</i> | <i>P. putida</i> | <i>P. carotovorum</i> | <i>P. caledonica</i> |
|------|--------------------|----------------|------------------|-----------------------|----------------------|
| 1    | 1.5                | 0.6            | 0.2              | 0.6                   | 1.9                  |
| 3    | 11.1               | 1.5            | 15.0             | 3.6                   | 27.4                 |
| 4    | 12.2               | 1.5            | 5.2              | 2.6                   | 9.2                  |
| 5    | NE                 | 1.6            | 0.2              | 0.2                   | NE                   |
| 6    | NE                 | 4.0            | 10.1             | 5.1                   | 5.6                  |
| 7    | 0.4                | 1.1            | 2.5              | 0.3                   | NE                   |
| 8    | 10.8               | 2.5            | 3.6              | 1.7                   | NE                   |
| 9    | 3.6                | 1.0            | NE               | NE                    | 6.5                  |
| 10   | NE                 | 1.3            | 3.6              | 2.1                   | 31.8                 |
| 11   | NE                 | NE             | NE               | NE                    | 18.2                 |
| 12   | NE                 | NE             | NE               | NE                    | NE                   |
| 13   | NE                 | NE             | NE               | NE                    | NE                   |
| 14   | NE                 | NE             | NE               | NE                    | 2.0                  |
| 16   | NE                 | 16.0           | 2.2              | 2.9                   | 4.1                  |
| 17   | NE                 | 114.3          | 2.6              | 1.5                   | 2.7                  |
| 18   | 32.9               | 7.5            | 31.3             | 3.3                   | 25.1                 |
| 19   | 1.8                | 51.2           | 0.3              | 0.3                   | 0.3                  |
| 20   | 1.4                | 0.5            | NE               | 0.2                   | 0.3                  |

Average selectivity indexes are calculated as the mean between the ratios of cytotoxicity  $EC_{50}$  ( $\mu$ M) verified for each human cell line (MCF-7 and HepG2) over each bacterial strains'  $EC_{50}$  ( $\mu$ M) values,  $SI = ((MCF-7 EC_{50}/bacterial strain EC_{50}) + (HepG2 EC_{50}/bacterial strain EC_{50}))/2$ . The highest the value, the more selective is the compound against the different bacterial strain. \*Cases where the maximum compound concentration assayed against the bacterial strain did not allow the observation of a half maximal effect concentration. NE, No Effective concentration observed.

**Table S3.** MIC values of established antibiotics for the ESKAPE strains tested in this paper as established by micro-broth dilution tests.

|                                | CCUG # | MIC ( $\mu$ M) |               |            |           |
|--------------------------------|--------|----------------|---------------|------------|-----------|
|                                |        | Amoxicillin    | Ciprofloxacin | Cefotaxime | Meropenem |
| <i>Escherichia coli</i>        | 17620  | 11-44          | 0.025         | 0.25-0.50  | 0.16      |
|                                | 67180  | 350            | 190           | 280        | 10-20     |
| CB ( $S \leq$ , $R \geq$ )     |        | 22, 22         | 0.75, 1.5     | 2, 4       | 5.2, 20   |
| <i>Klebsiella pneumoniae</i>   | 225T   | 350            | 0.18          | 0.25       | 0.16-0.32 |
|                                | 58547  | 350            | 190           | 560        | >80       |
| CB ( $S \leq$ , $R \geq$ )     |        | 22, 22         | 0.75, 1.5     | 2, 4       | 5.2, 20   |
| <i>Pseudomonas aeruginosa</i>  | 17619  | 350            | 1.5-3         | 36         | 2.6-5.2   |
|                                | 59347  | 350            | 100           | >560       | 335       |
| CB ( $S \leq$ , $R \geq$ )     |        | -              | 0.003, 1.5    | -          | 5.2, 20   |
| <i>Acinetobacter baumannii</i> | 57250  | 175            | 200           | 36         | 40        |
|                                | 57035  | 175            | 200           | >560       | 335       |
| CB ( $S \leq$ , $R \geq$ )     |        | -              | 0.003, 3      | -          | 5.2, 20   |
| <i>Enterobacter cloacae</i>    | 6323T  | 350            | 0.025-0.050   | 9-36       | 0.6-1.2   |
| <i>resp. hormaechei</i>        | 58962  | 350            | 0.1           | 280        | 0.3       |
| CB ( $S \leq$ , $R \geq$ )     |        | 22, 22         | 0.75, 1.5     | 2, 4       | 5.2, 20   |

Minimal Inhibitory Concentration (MIC) are expressed in  $\mu$ M for each antibiotic. When applicable, clinical breakpoint concentrations (CB) as defined by EUCAST 2022-01-01 ([https://www.eucast.org/clinical\\_breakpoints/](https://www.eucast.org/clinical_breakpoints/)) are indicated in  $\mu$ M.

**Table S4.** Genomic G/C content of bacterial species (%).

|                                    | <b>C/G (%)</b> | <b>NCBI Reference Sequence</b> |
|------------------------------------|----------------|--------------------------------|
| <b>Escherichia coli</b>            | 50.8           | NC_000913.3                    |
| <b>Klebsiella pneumoniae</b>       | 57.1           | NC_016845.1                    |
| <b>Acinetobacter baumannii</b>     | 39             | NZ_CP043953.1                  |
| <b>Pseudomonas aeruginosa</b>      | 66.2           | NC_002516.2                    |
| <b>Enterobacter cloacae</b>        | 55             | NZ_CP009756.1                  |
| <b>Enterobacter hormaechei</b>     | 55             | GCF_000694955.1                |
| <b>Bacillus subtilis</b>           | 43.5           | NC_000964.3                    |
| <b>Pectobacterium carotovorum</b>  | 51.9           | NZ_CP051652.1                  |
| <b>Paraburkholderia caledonica</b> | 61.9           | GCF_000383275.1                |
| <b>Pseudomonas putida</b>          | 61.9           | NC_021505.1                    |

## SUPPLEMENTARY FIGURES

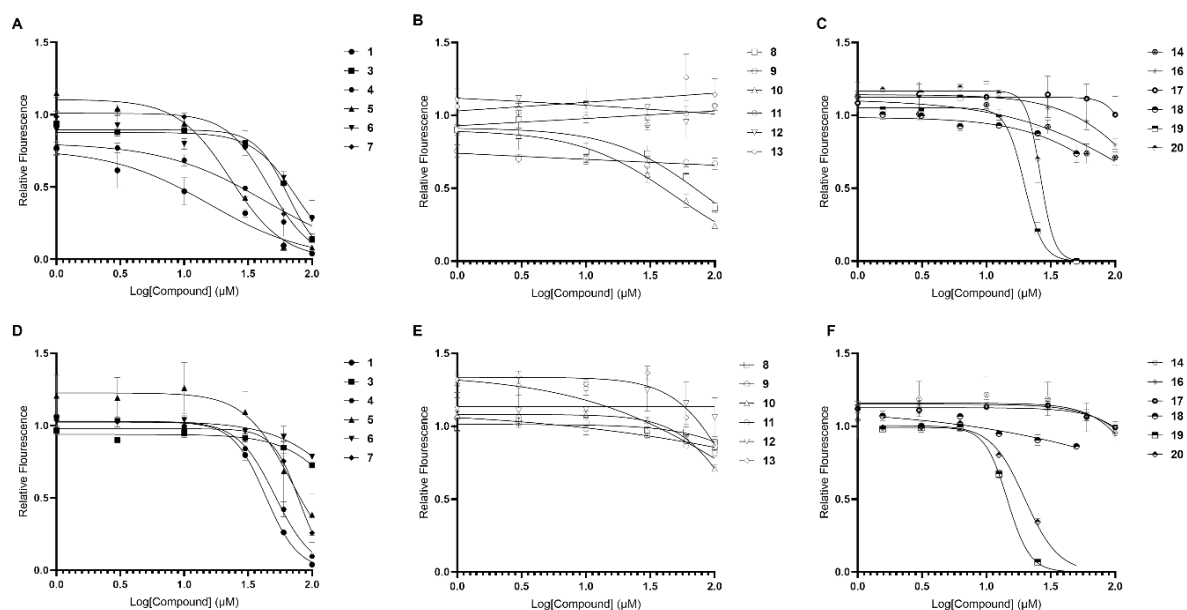

**Figure S1.** Cytotoxicity dose-response curves of all compounds against MCF-7 (A, B and C) and HepG2 (D, E and F) cell lines. The mean half maximal effective concentrations ( $\text{EC}_{50}$  in  $\mu\text{M}$ ) for each compound against the correspondent cell lines were calculated using non-linear regression dose-response inhibition following a log(agonist) vs. response, shown in Table 1. Error bars represent the SEM.



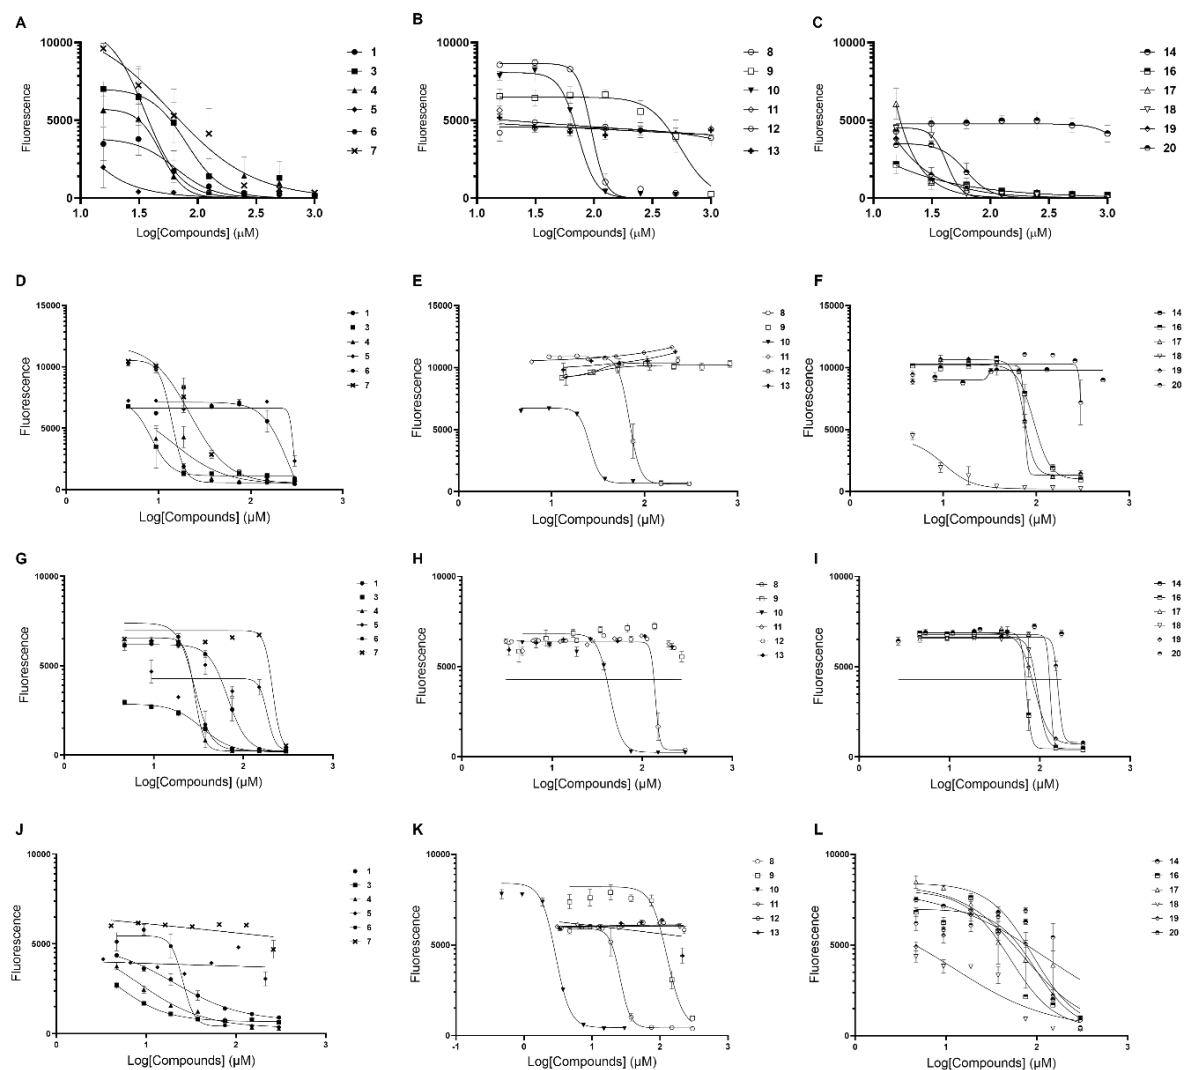

**Figure S2.** Antibacterial activity dose-response curves of all compounds against Gram-negative *E. coli* (A, B and C), *P. putida* (D, E and F), *P. carotovorum* (G, H and I) and *P. caledonica* (J, K and L). EC<sub>50</sub> and EC<sub>90</sub> values (in  $\mu\text{M}$ ) determined for each compound can be found in Table S1.

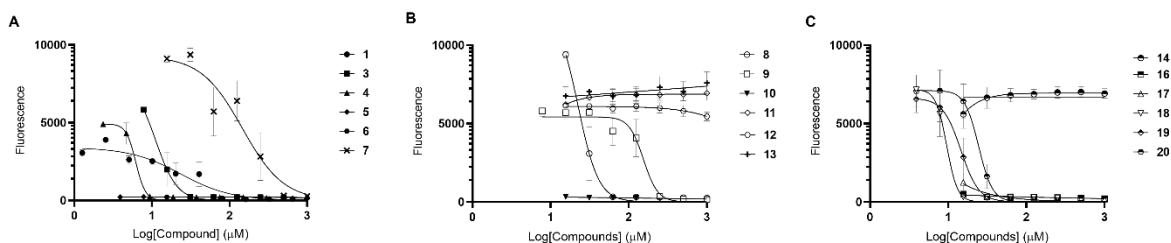

**Figure S3.** Antibacterial activity dose-response curves of all compounds against Gram-positive *B. subtilis* (A, B and C). EC<sub>50</sub> and EC<sub>90</sub> values (in  $\mu\text{M}$ ) determined for each compound can be found in Table S1.

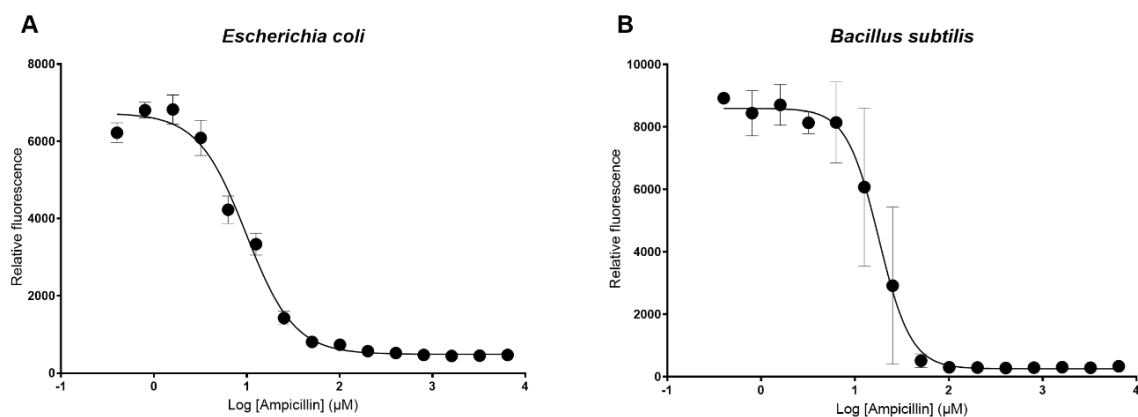

**Figure S4.** Measurements of the antibacterial activity of ampicillin, as a positive control antibiotic tested against Gram-negative *Escherichia coli* (A) and Gram-positive *Bacillus subtilis* (B). Ampicillin showed an  $EC_{50} = 11.5 \mu M$  (SD = 0.72; SE range 11.1 to 11.9  $\mu M$ ) and an  $EC_{90} = 89.2 \mu M$  (SD = 14.8; SE range 81.5 to 98.6  $\mu M$ ) against *E. coli* and an  $EC_{50} = 17.2 \mu M$  (SD = 8.9; SE range 13.5 to 23.8  $\mu M$ ) and an  $EC_{90} = 160.4 \mu M$  (SD = 42.8; SE range 97.1 to 146.5  $\mu M$ ) against *B. subtilis*, as previously reported (European Committee on Antimicrobial Susceptibility Testing. Data from the EUCAST MIC distribution website, last accessed November 2020". <http://www.eu-cast.org>).

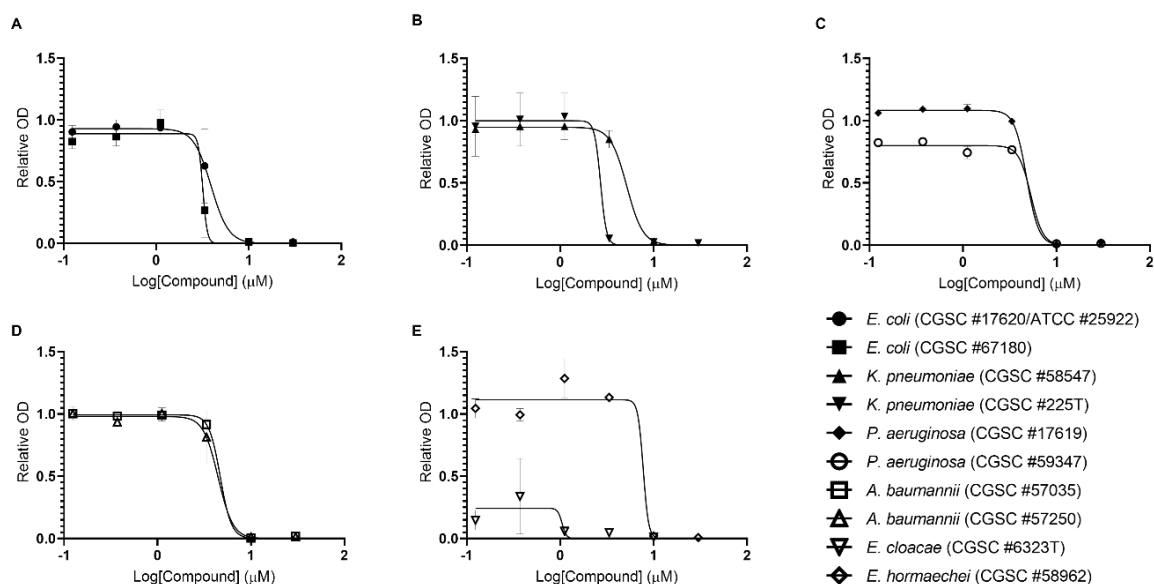

**Figure S5.** Antibacterial activity dose-response curves of **1** against the 10 Gram-negative bacteria *E. coli* CCUG #67180 and CCUG #17620/ATCC #25922 (control strain) (A), *K. pneumoniae* CCUG #58547 and CCUG #225T (B), *P. aeruginosa* CCUG #17619 and CCUG #59347 (C), *A. baumannii* CCUG #57035 and CCUG #57250 (D), *E. cloacae* CCUG #6323T and *E. hormaechei* CCUG #58962 (E).  $EC_{50}$  and  $EC_{90}$  values (in  $\mu M$ ) can be found in Table 2.

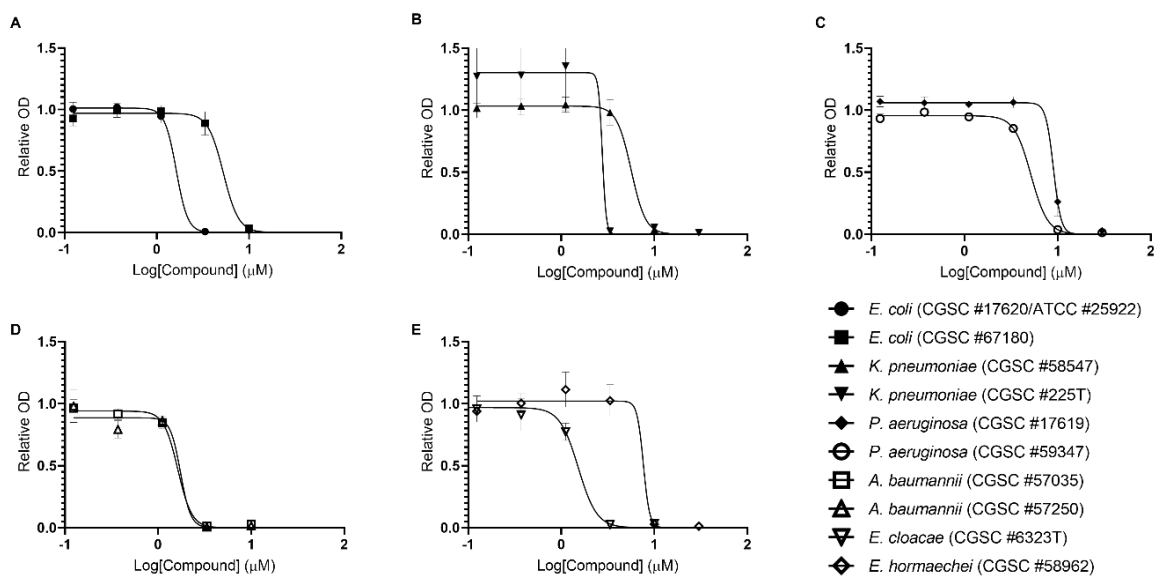

**Figure S6.** Antibacterial activity dose-response curves of **3** against the 10 Gram-negative bacteria *E. coli* CCUG #67180 and CCUG #17620/ATCC #25922 (control strain) (A), *K. pneumoniae* CCUG #58547 and CCUG #225T (B), *P. aeruginosa* CCUG #17619 and CCUG #59347 (C), *A. baumannii* CCUG #57035 and CCUG #57250 (D), *E. cloacae* CCUG #6323T and *E. hormaechei* CCUG #58962 (E). EC<sub>50</sub> and EC<sub>90</sub> values (in  $\mu\text{M}$ ) can be found in Table 2.

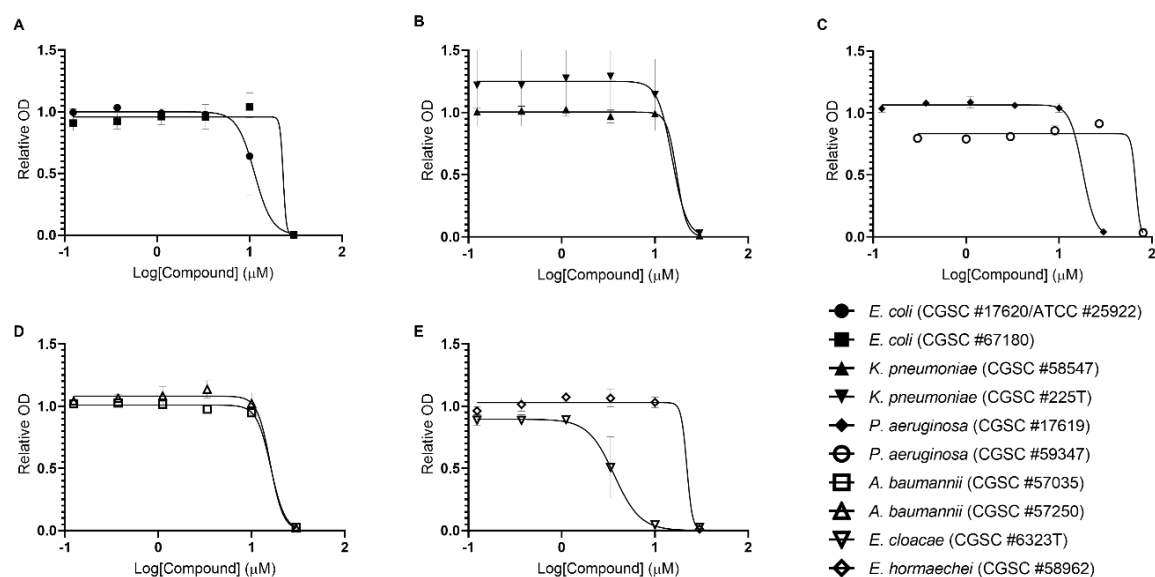

**Figure S7.** Antibacterial activity dose-response curves of **4** against the 10 Gram-negative bacteria *E. coli* CCUG #67180 and CCUG #17620/ATCC #25922 (control strain) (A), *K. pneumoniae* CCUG #58547 and CCUG #225T (B), *P. aeruginosa* CCUG #17619 and CCUG #59347 (C), *A. baumannii* CCUG #57035 and CCUG #57250 (D), *E. cloacae* CCUG #6323T and *E. hormaechei* CCUG #58962 (E). EC<sub>50</sub> and EC<sub>90</sub> values (in  $\mu\text{M}$ ) can be found in Table 2.

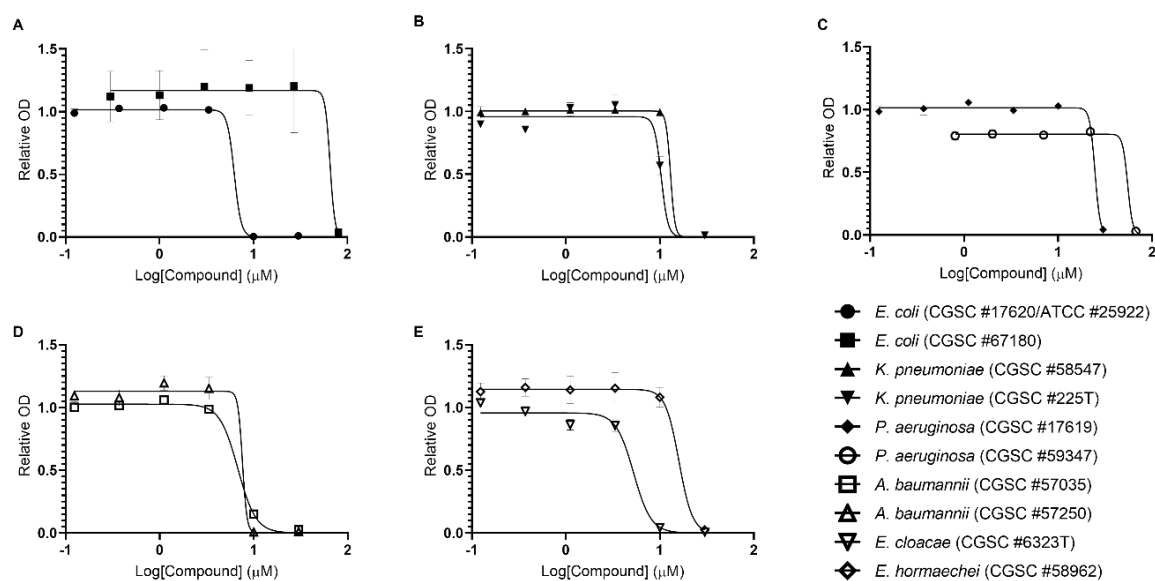

**Figure S8.** Antibacterial activity dose-response curves of **6** against the 10 Gram-negative bacteria *E. coli* CCUG #67180 and CCUG #17620/ATCC #25922 (control strain) (A), *K. pneumoniae* CCUG #58547 and CCUG #225T (B), *P. aeruginosa* CCUG #17619 and CCUG #59347 (C), *A. baumannii* CCUG #57035 and CCUG #57250 (D), *E. cloacae* CCUG #6323T and *E. hormaechei* CCUG #58962 (E).  $\text{EC}_{50}$  and  $\text{EC}_{90}$  values (in  $\mu\text{M}$ ) can be found in Table 2.

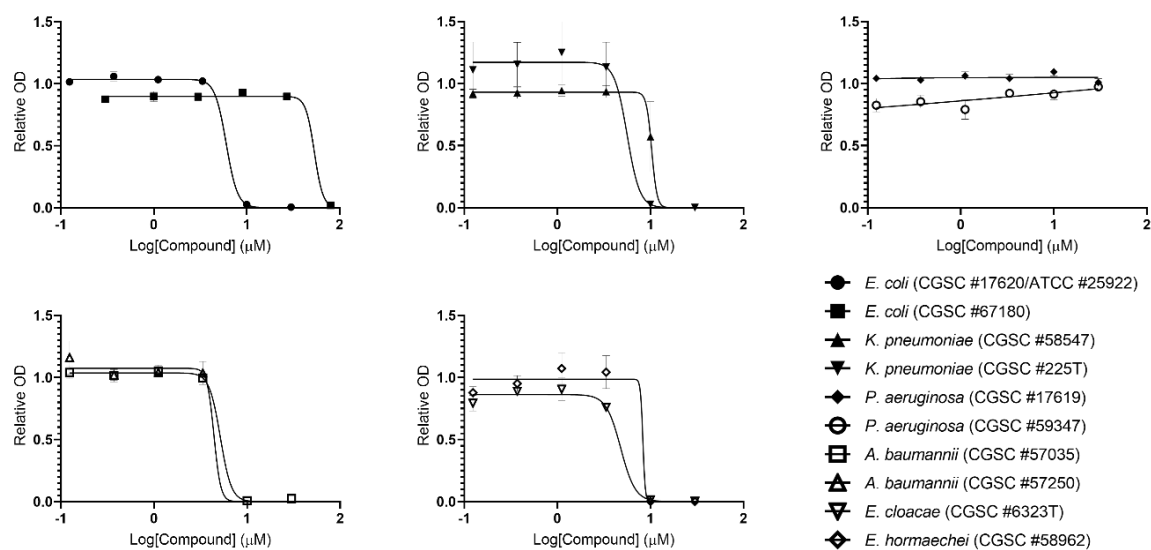

**Figure S9.** Antibacterial activity dose-response curves of **8** against the 10 Gram-negative bacteria *E. coli* CCUG #67180 and CCUG #17620/ATCC #25922 (control strain) (A), *K. pneumoniae* CCUG #58547 and CCUG #225T (B), *P. aeruginosa* CCUG #17619 and CCUG #59347 (C), *A. baumannii* CCUG #57035 and CCUG #57250 (D), *E. cloacae* CCUG #6323T and *E. hormaechei* CCUG #58962 (E).  $\text{EC}_{50}$  and  $\text{EC}_{90}$  values (in  $\mu\text{M}$ ) can be found in Table 2.

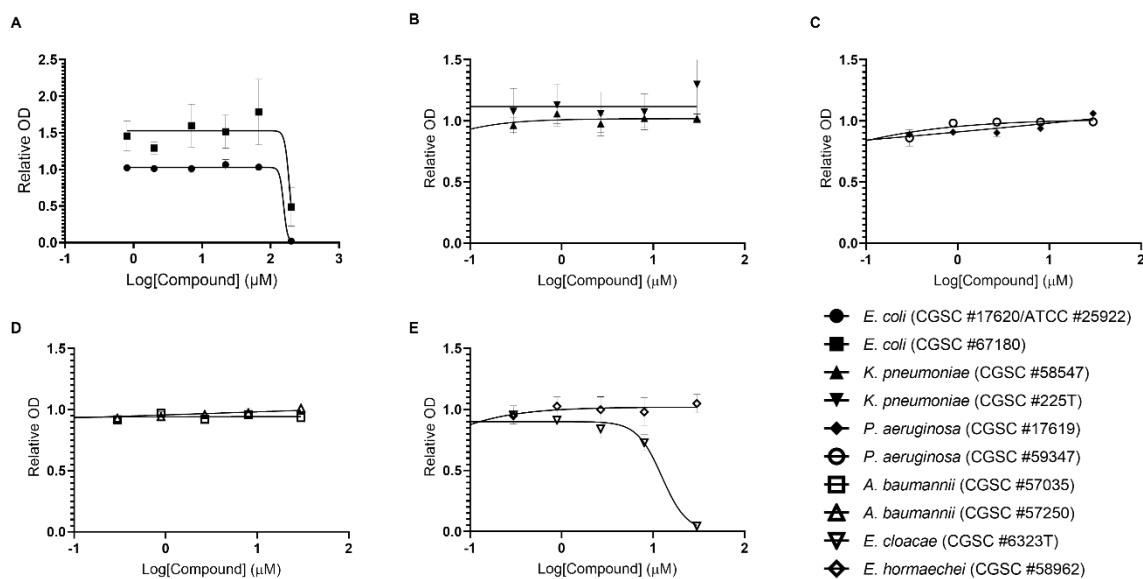

**Figure S10.** Antibacterial activity dose-response curves of **10** against the 10 Gram-negative bacteria *E. coli* CCUG #67180 and CCUG #17620/ATCC #25922 (control strain) (A), *K. pneumoniae* CCUG #58547 and CCUG #225T (B), *P. aeruginosa* CCUG #17619 and CCUG #59347 (C), *A. baumannii* CCUG #57035 and CCUG #57250 (D), *E. cloacae* CCUG #6323T and *E. hormaechei* CCUG #58962 (E). EC<sub>50</sub> and EC<sub>90</sub> values (in  $\mu\text{M}$ ) can be found in Table 2.

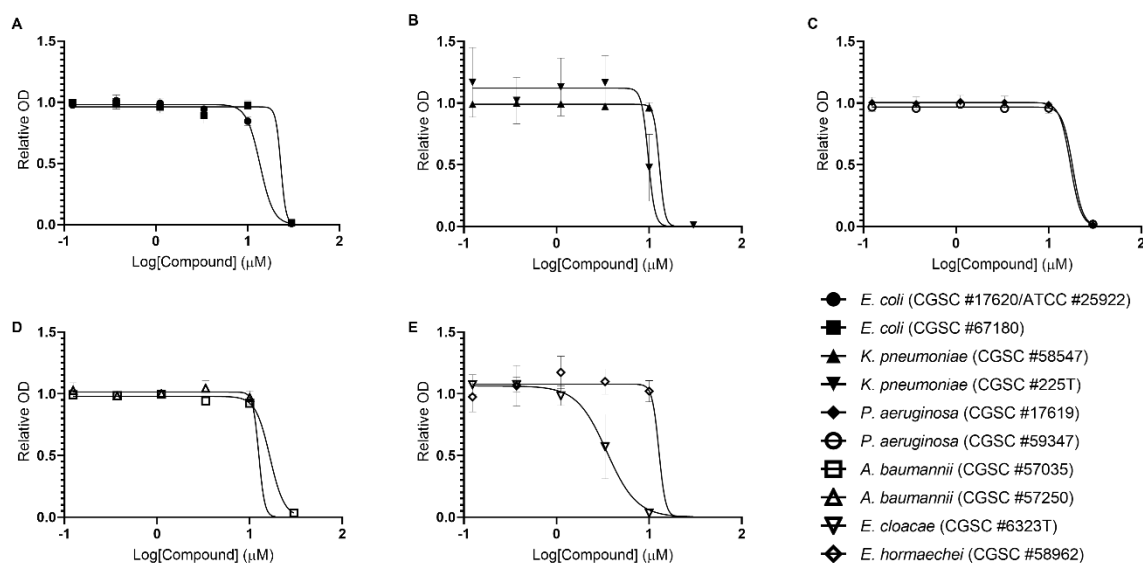

**Figure S11.** Antibacterial activity dose-response curves of **16** against the 10 Gram-negative bacteria *E. coli* CCUG #67180 and CCUG #17620/ATCC #25922 (control strain) (A), *K. pneumoniae* CCUG #58547 and CCUG #225T (B), *P. aeruginosa* CCUG #17619 and CCUG #59347 (C), *A. baumannii* CCUG #57035 and CCUG #57250 (D), *E. cloacae* CCUG #6323T and *E. hormaechei* CCUG #58962 (E). EC<sub>50</sub> and EC<sub>90</sub> values (in  $\mu\text{M}$ ) can be found in Table 2.

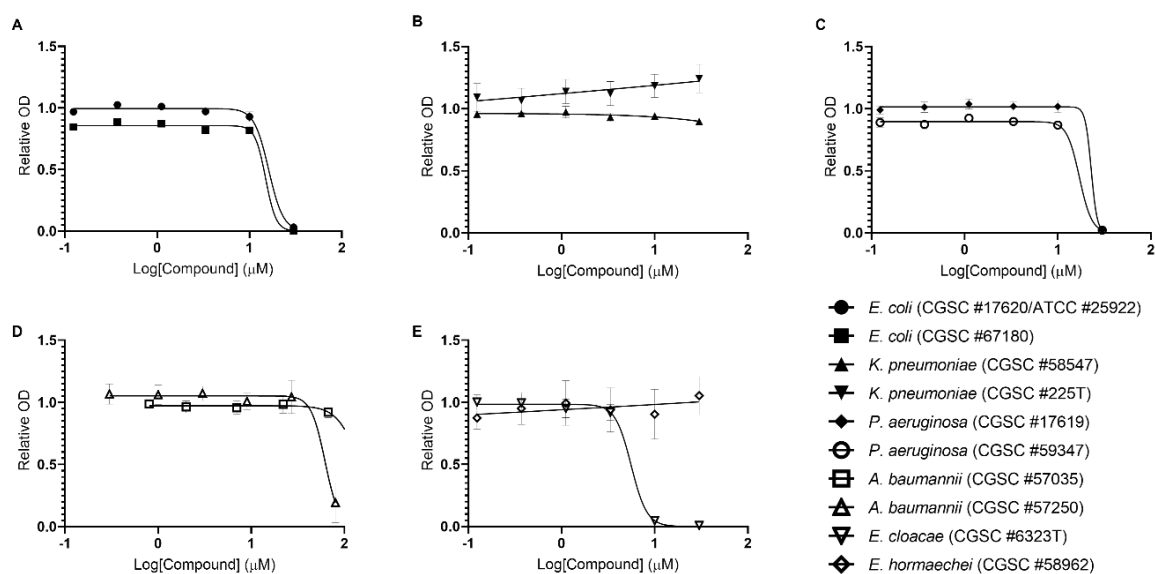

**Figure S12.** Antibacterial activity dose-response curves of **17** against the 10 Gram-negative bacteria *E. coli* CCUG #67180 and CCUG #17620/ATCC #25922 (control strain) (A), *K. pneumoniae* CCUG #58547 and CCUG #225T (B), *P. aeruginosa* CCUG #17619 and CCUG #59347 (C), *A. baumannii* CCUG #57035 and CCUG #57250 (D), *E. cloacae* CCUG #6323T and *E. hormaechei* CCUG #58962 (E). EC<sub>50</sub> and EC<sub>90</sub> values (in  $\mu\text{M}$ ) can be found in Table 2.

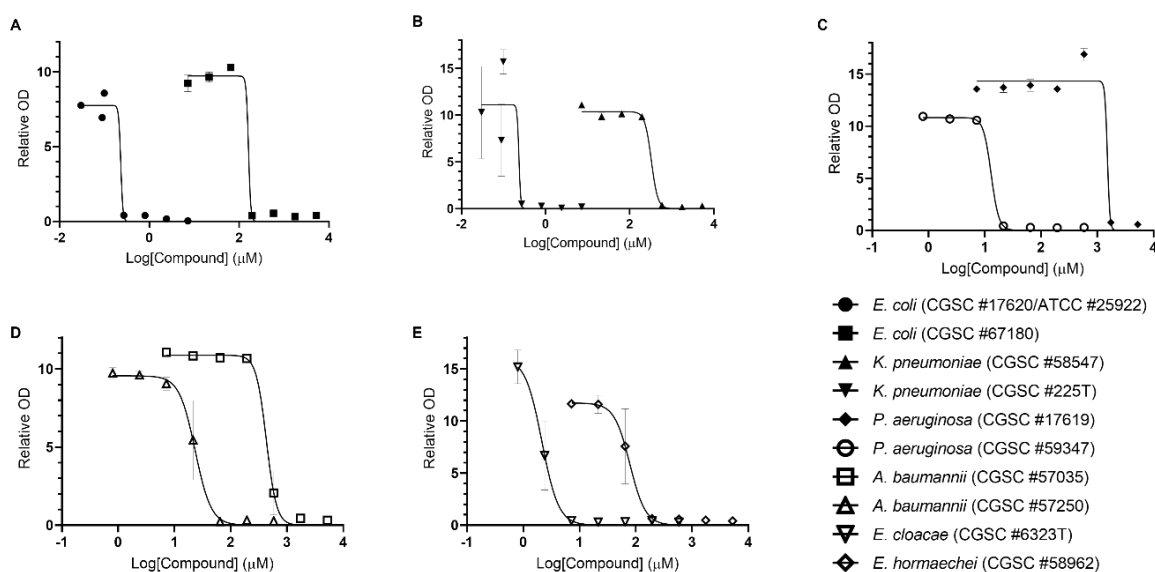

**Figure S13.** Antibacterial activity dose-response curves of the known antibiotic Cefotaxime (CTX) as a control against the 10 Gram-negative bacteria *E. coli* CCUG #67180 and CCUG #17620/ATCC #25922 (control strain) (A), *K. pneumoniae* CCUG #58547 and CCUG #225T (B), *P. aeruginosa* CCUG #17619 and CCUG #59347 (C), *A. baumannii* CCUG #57035 and CCUG #57250 (D), *E. cloacae* CCUG #6323T and *E. hormaechei* CCUG #58962 (E). EC<sub>50</sub>, EC<sub>90</sub> and SI values (in  $\mu\text{M}$ ) can be found in Table 2.

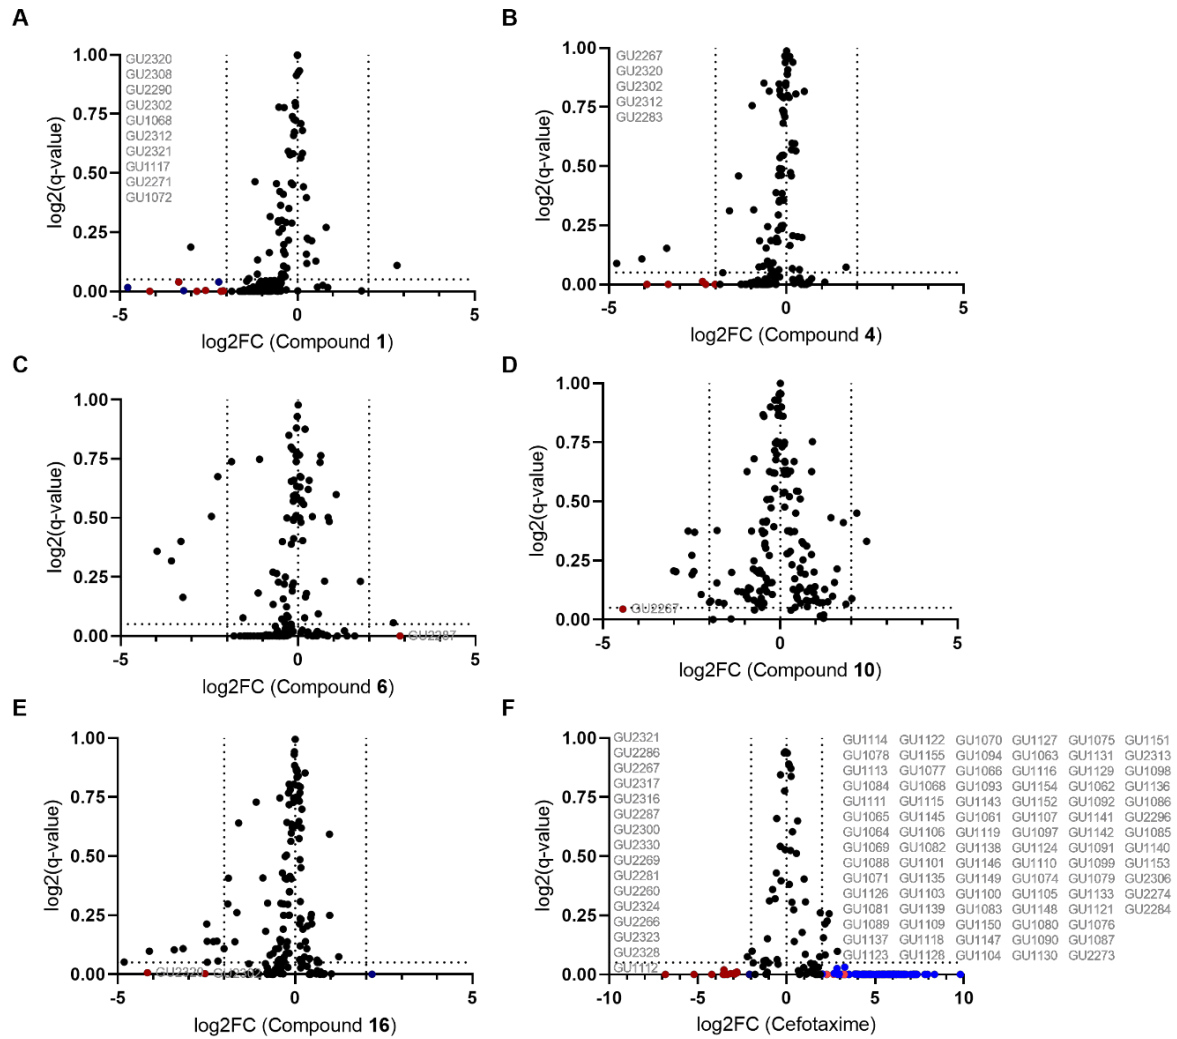

**Figure S14.** High-resolution microbial phenomics profiling of the synthesized compounds **1** (A), **4** (B), **6** (C), **10** (D) and **16** (E), and the known antibiotic cefotaxime (F) against two *E. coli* antibiotic resistant libraries. Volcano plots show a total of 168 strains screened from the ECOR (n=72) and ESBL (n=96) libraries. The strains presenting a differential yield growth relative to the reference strain *E. coli* CCUG #17620/ATCC #25922 are shown, where statistically significant strains more sensitive fall within a  $\log_2\text{FC} \geq -2.0$  and  $-\log_2(\text{q-value}) \leq 0.05$  (left quadrant in light red for ECOR and light blue for ESBL libraries) and resistant within a  $\log_2\text{FC} \geq 2.0$  and  $-\log_2(\text{q-value}) \leq 0.05$  (right quadrant in dark red for ECOR and dark blue for ESBL libraries).

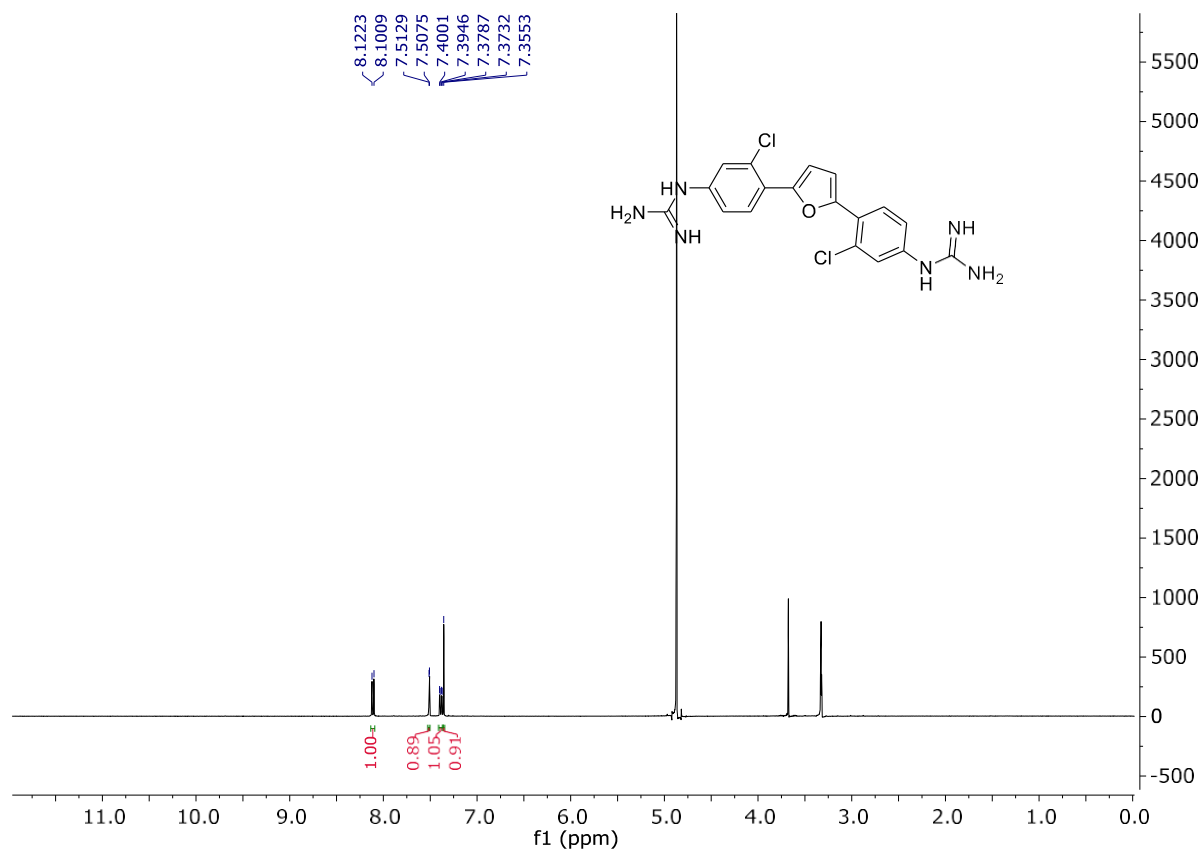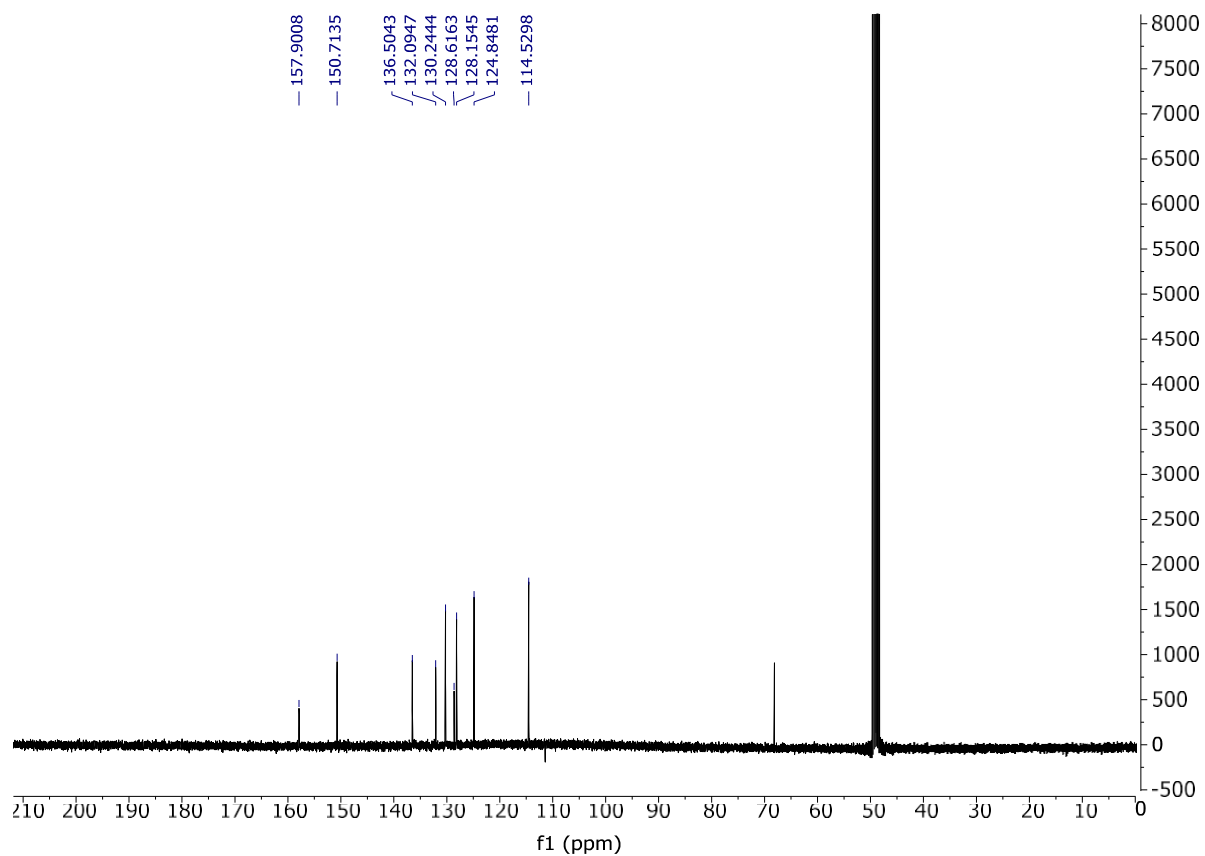



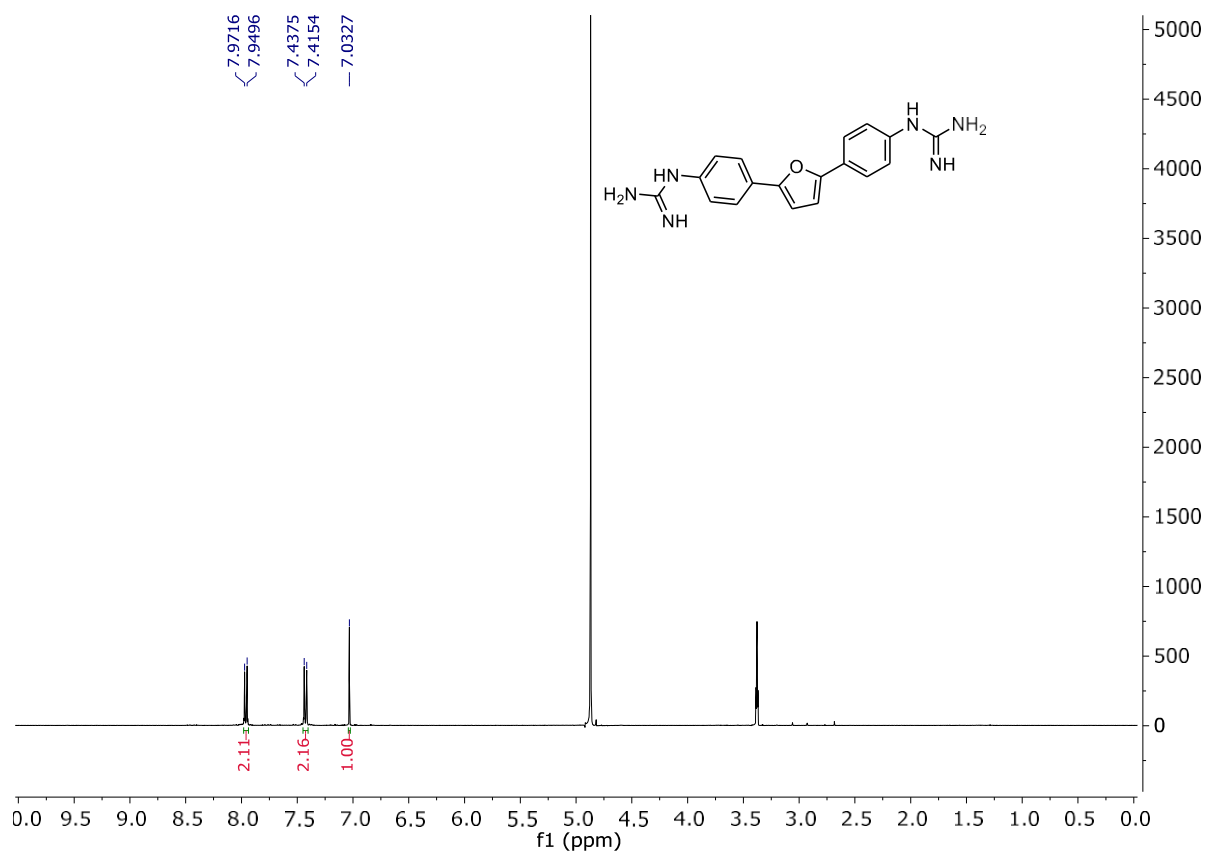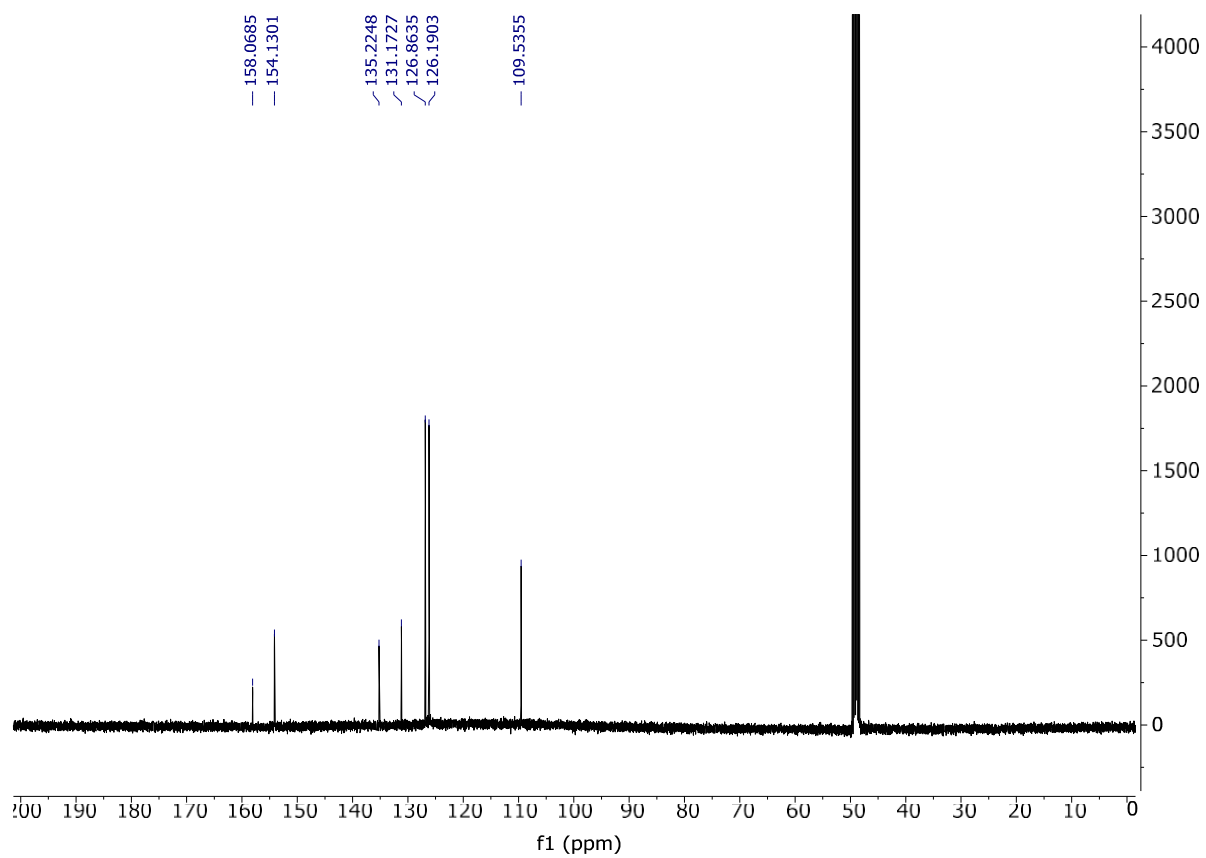

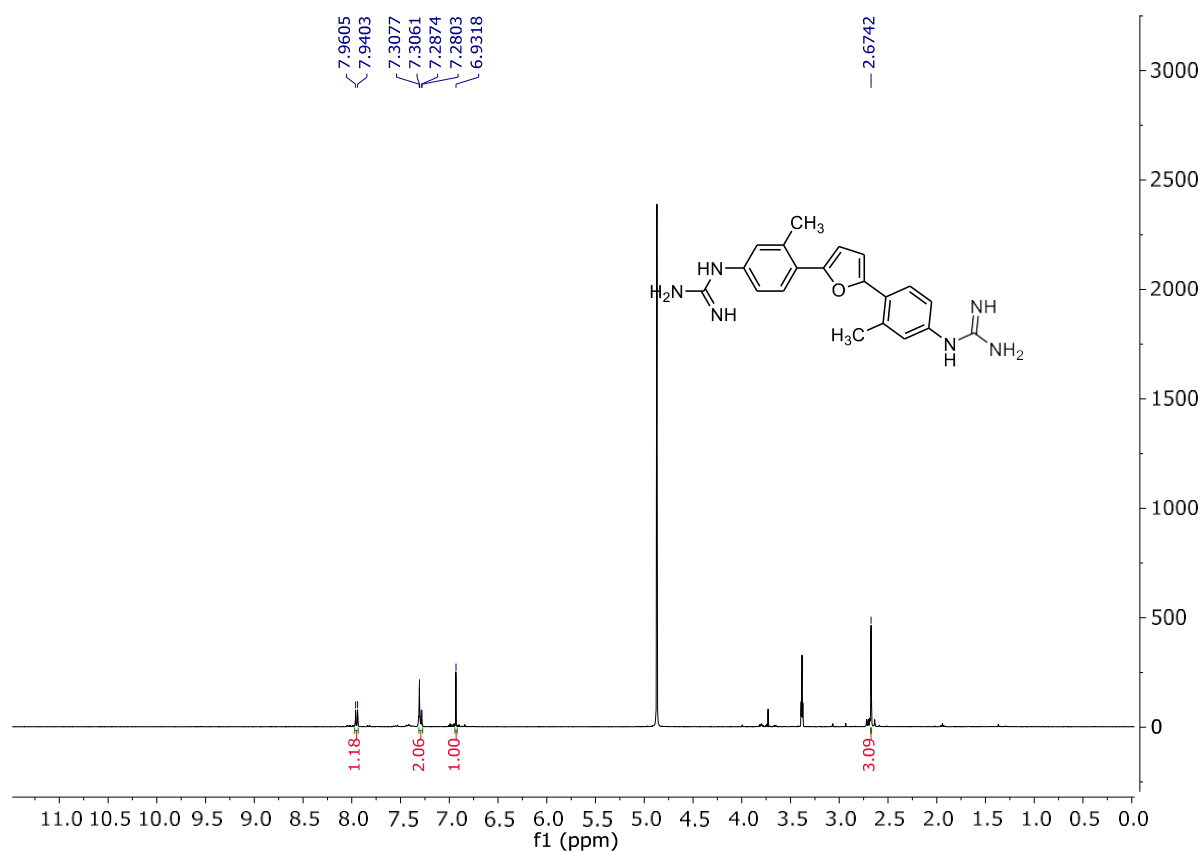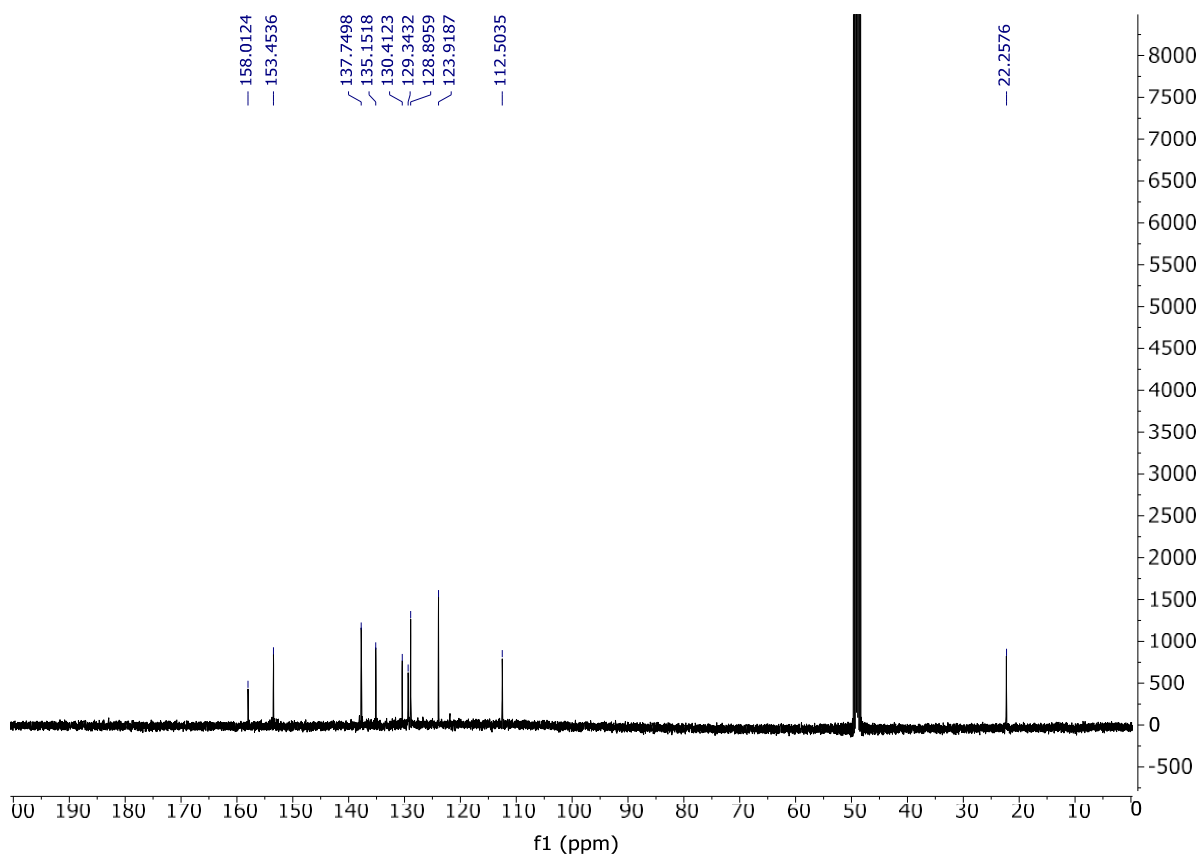

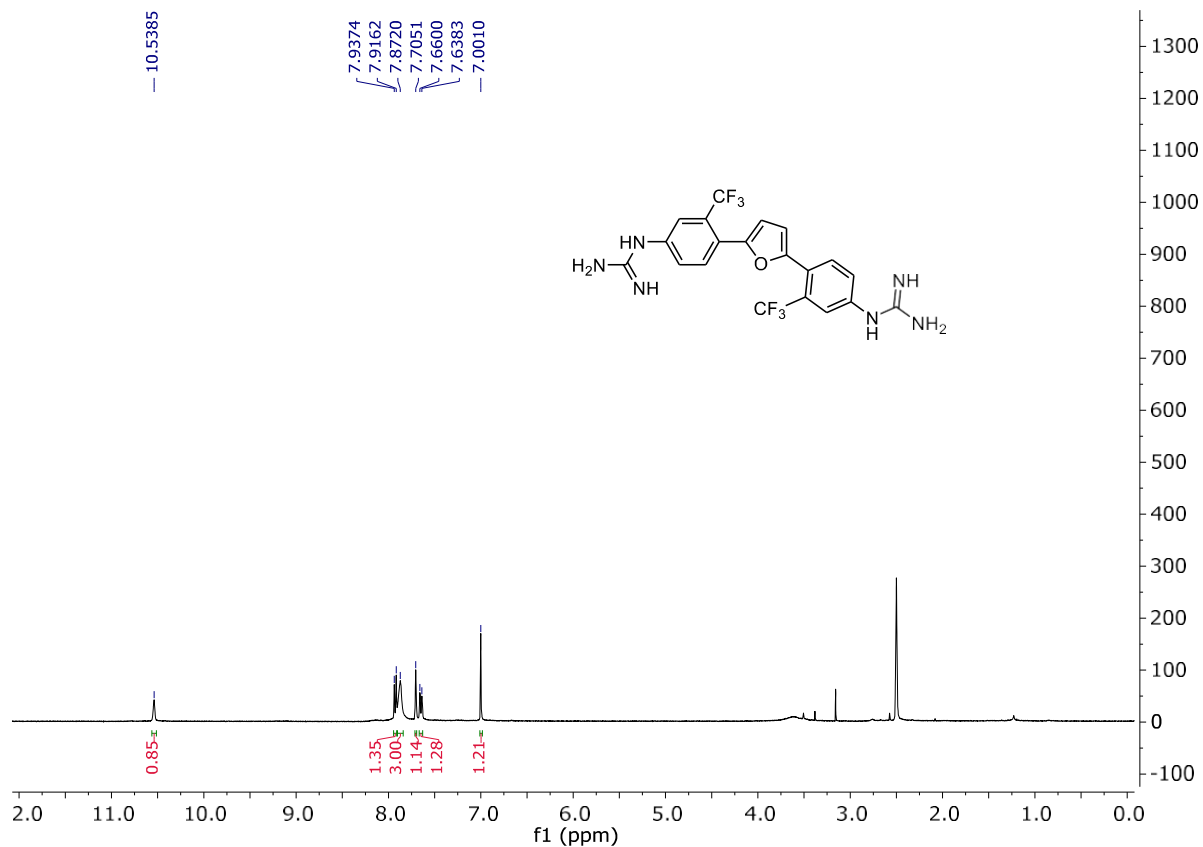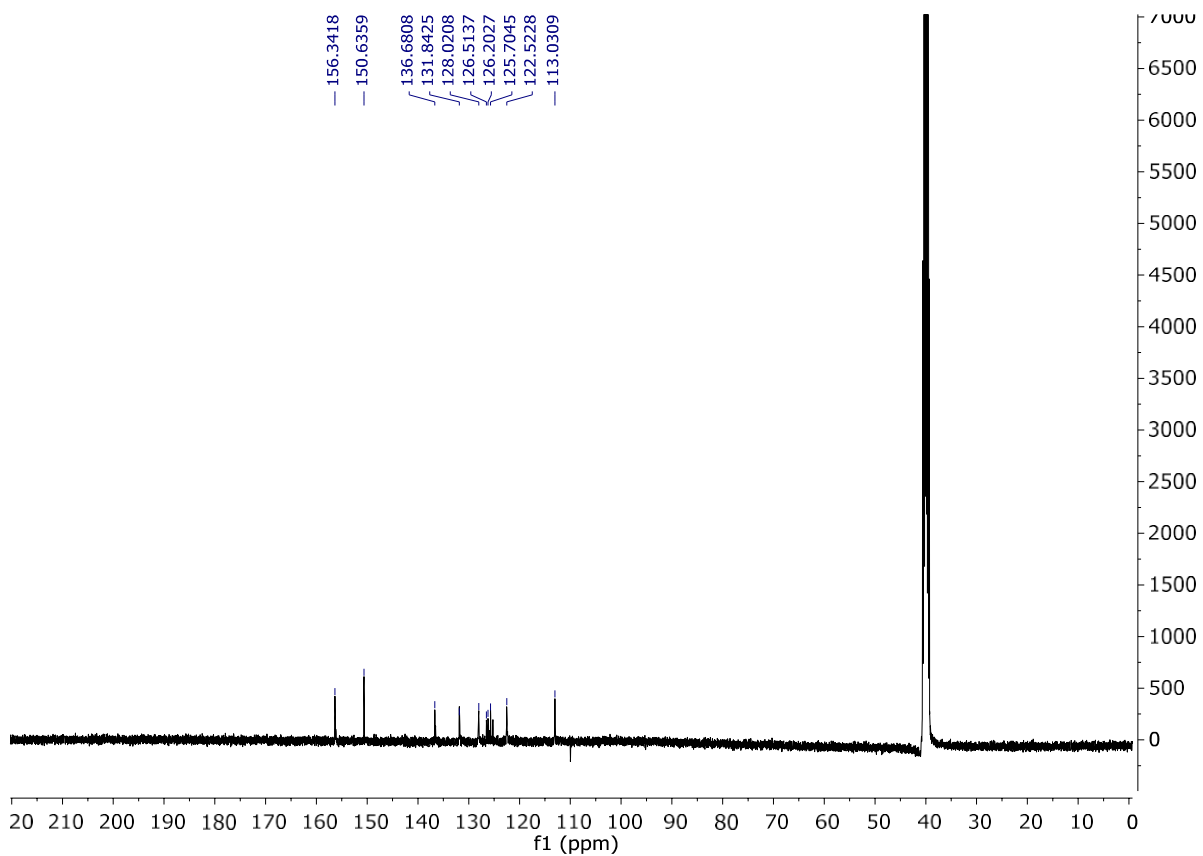

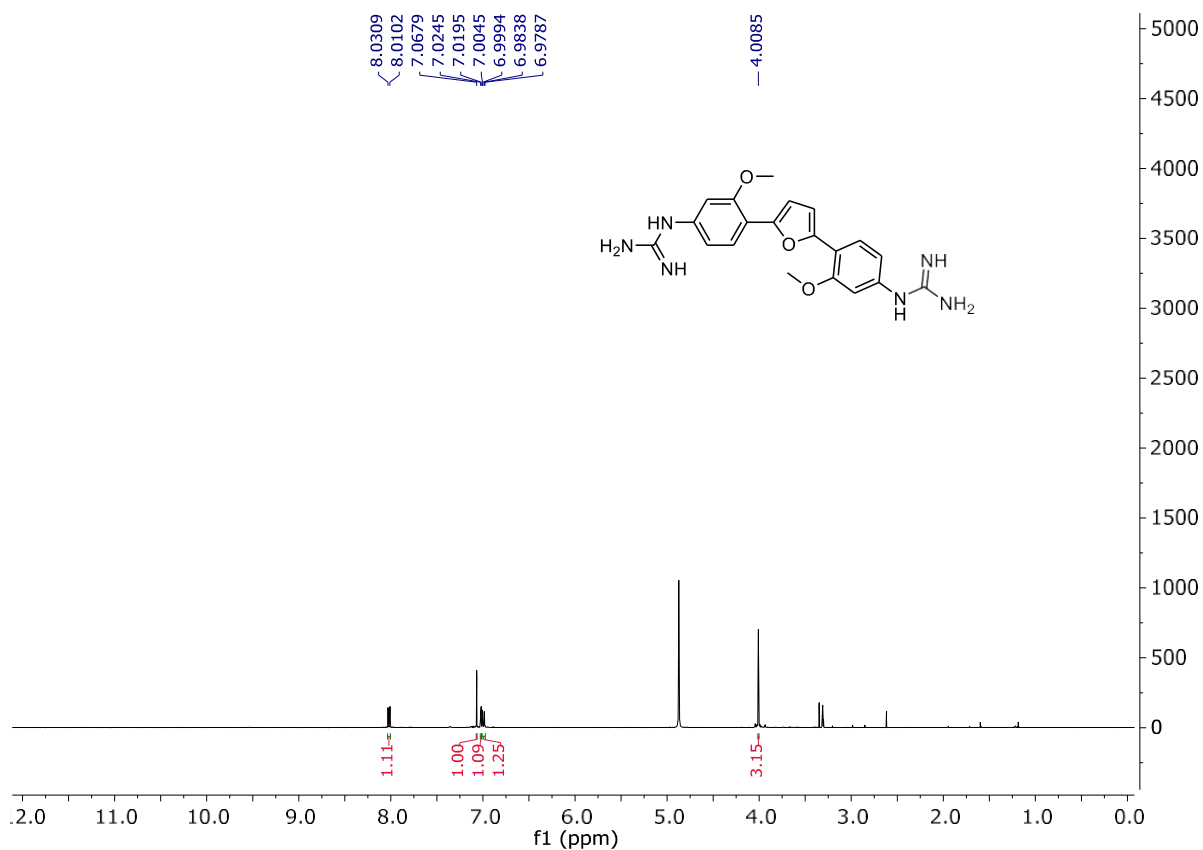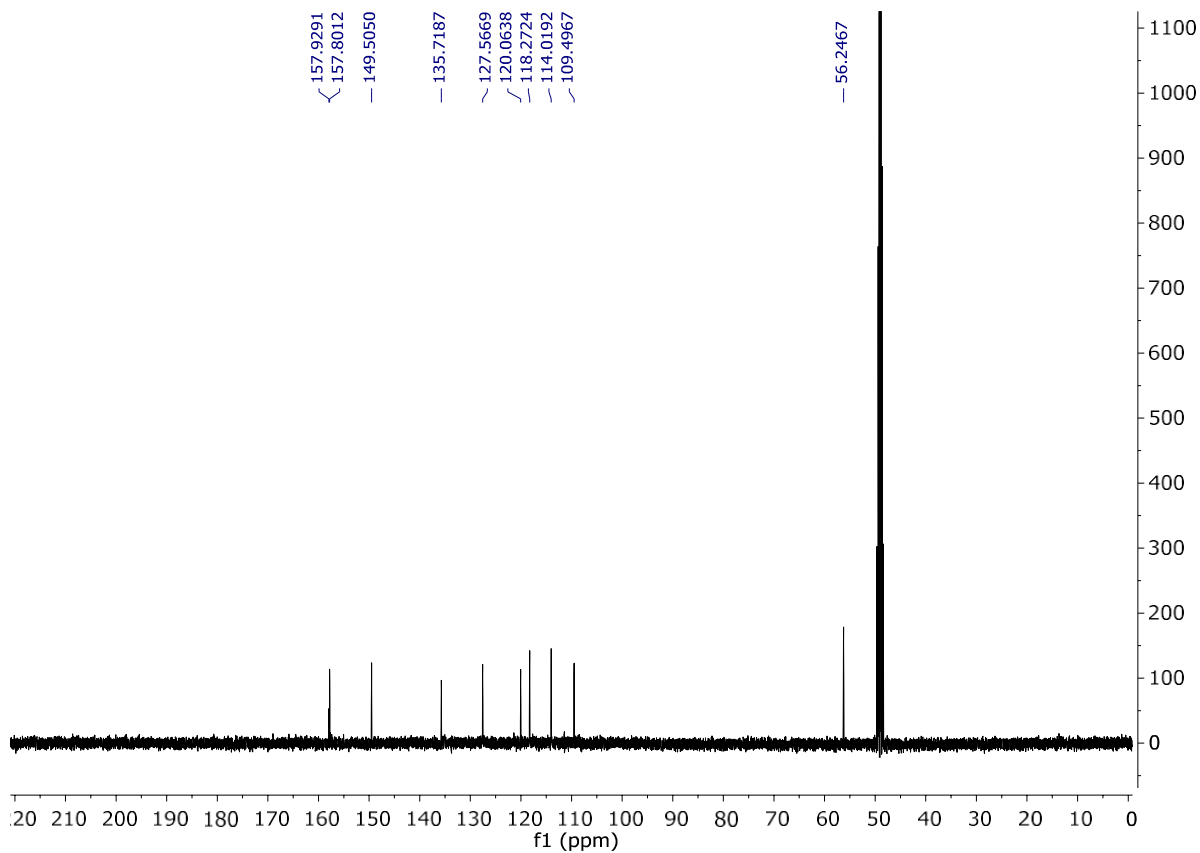

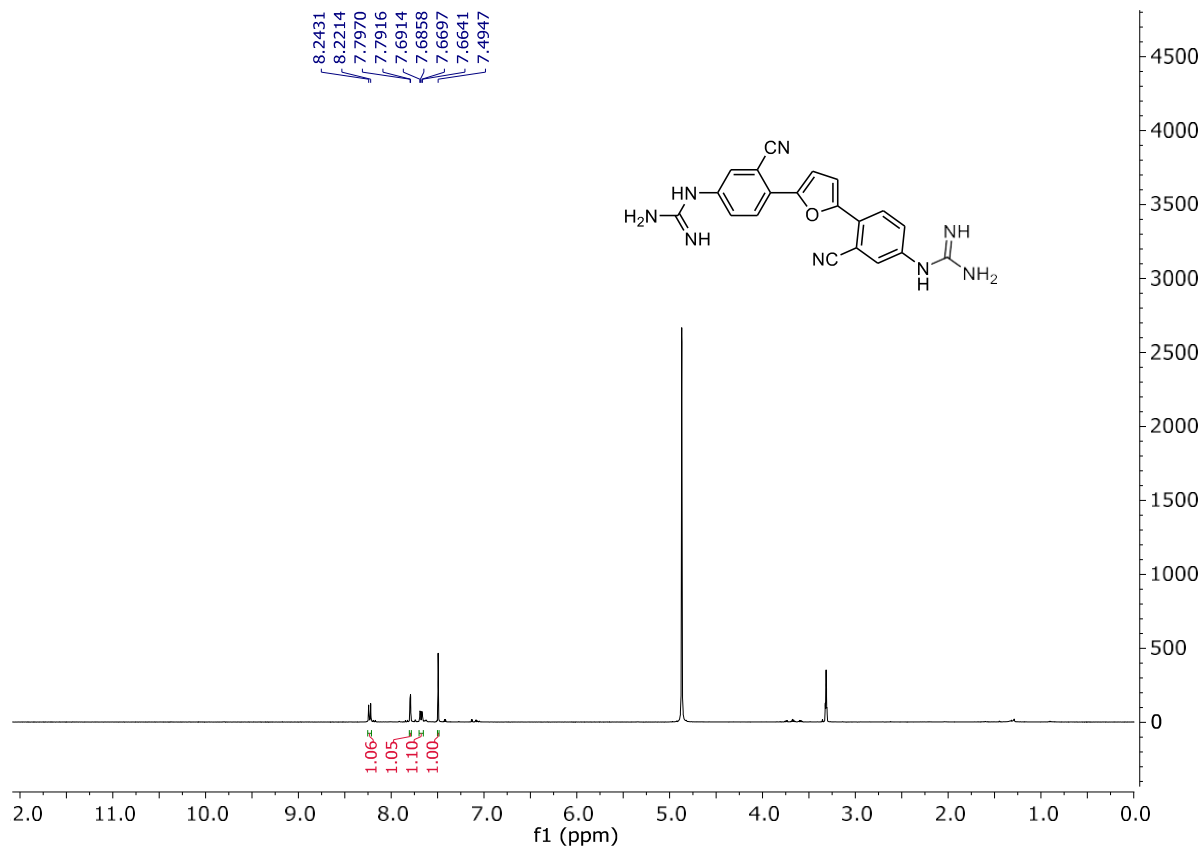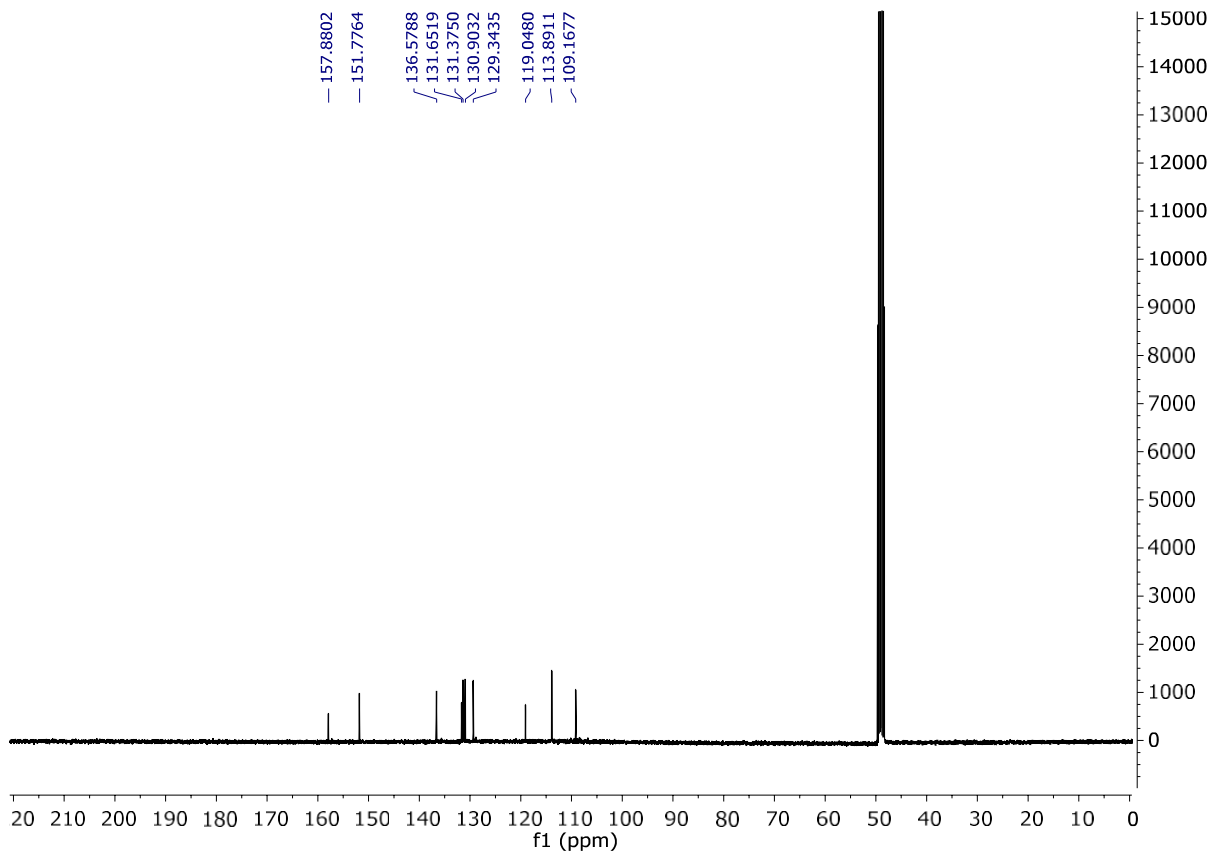

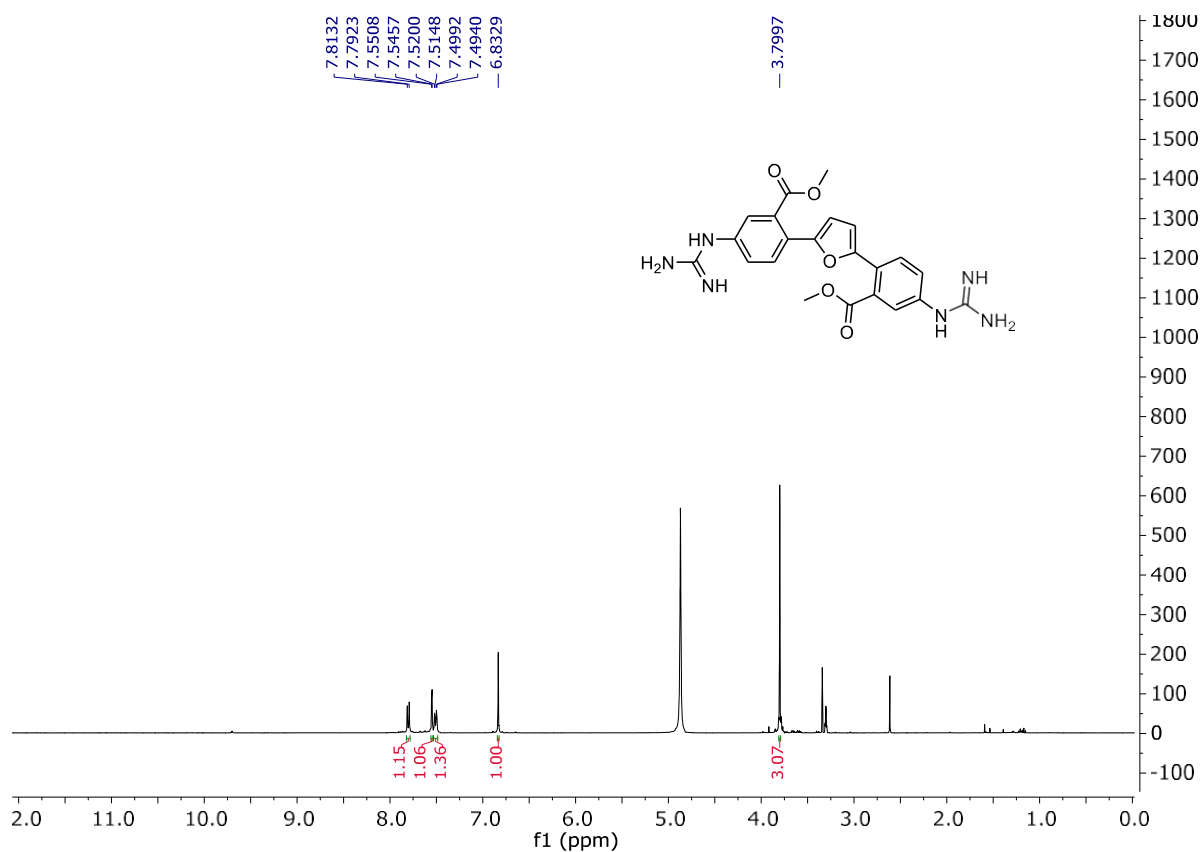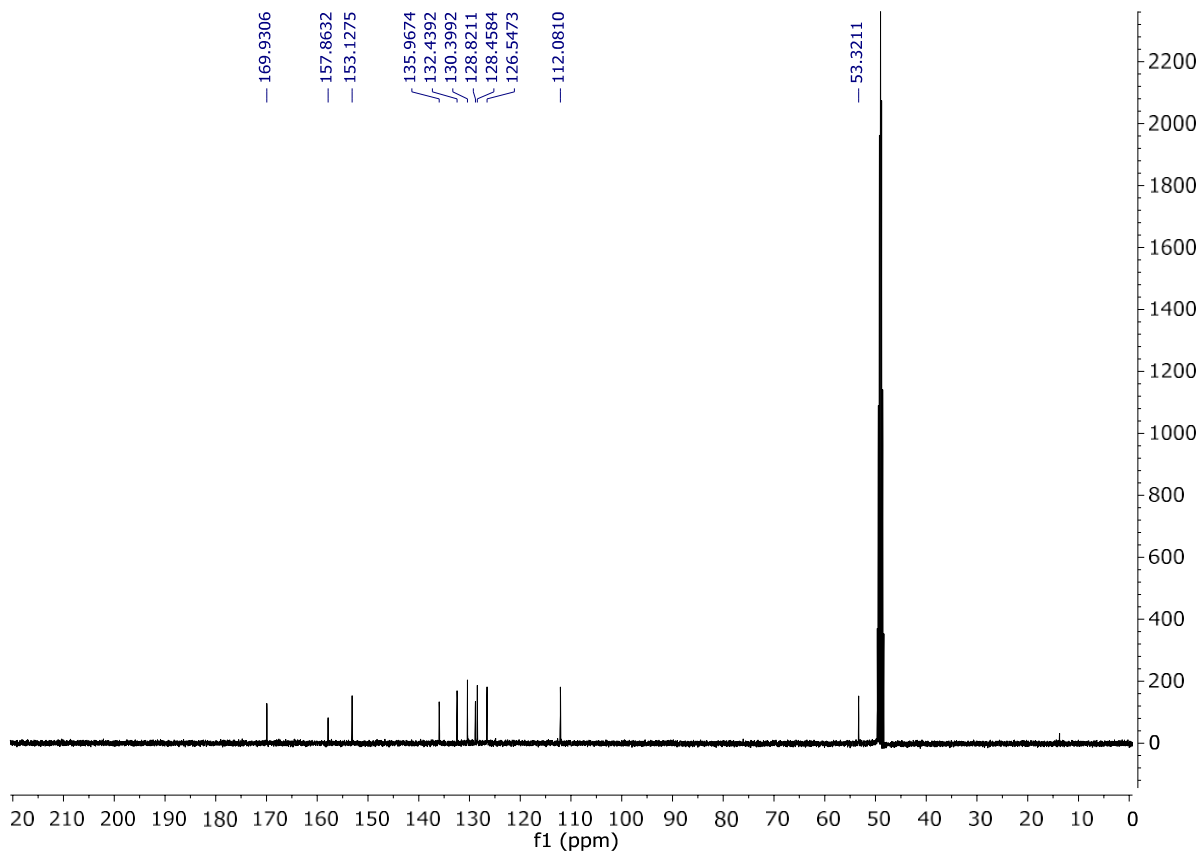

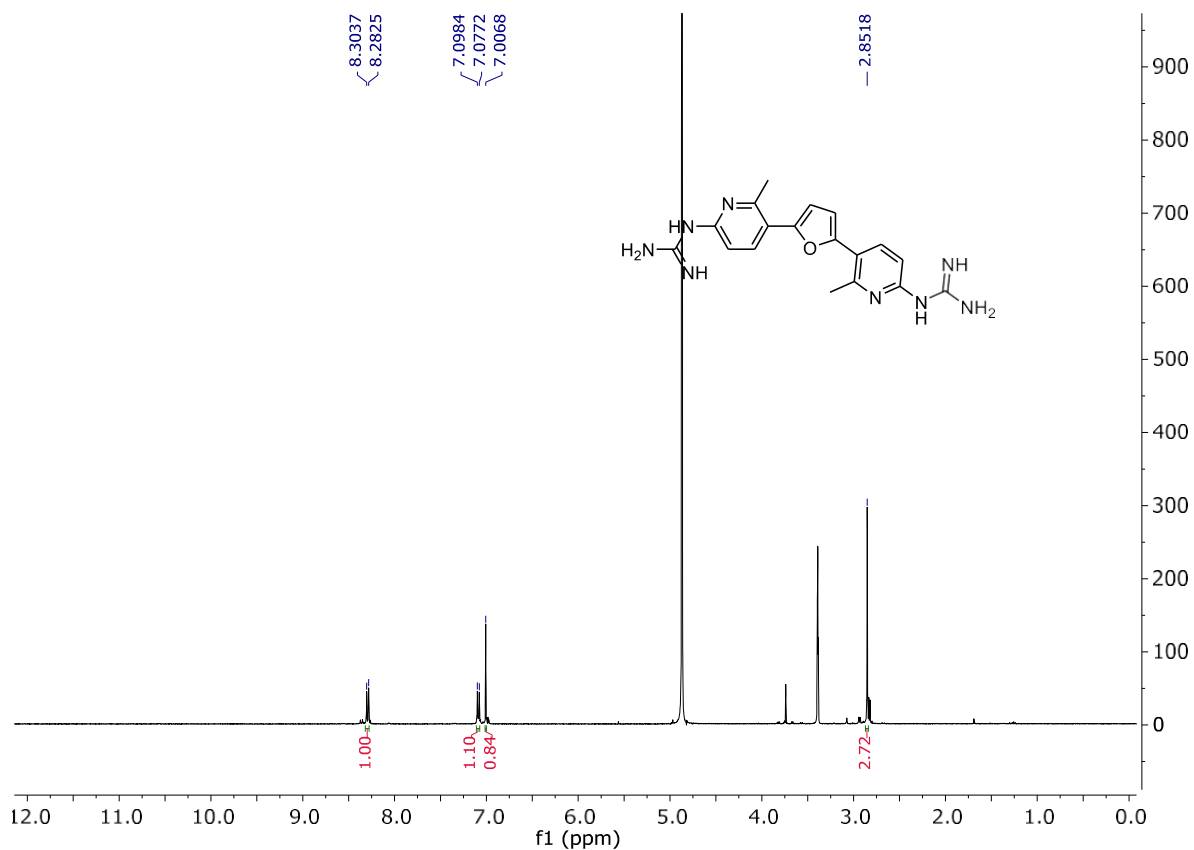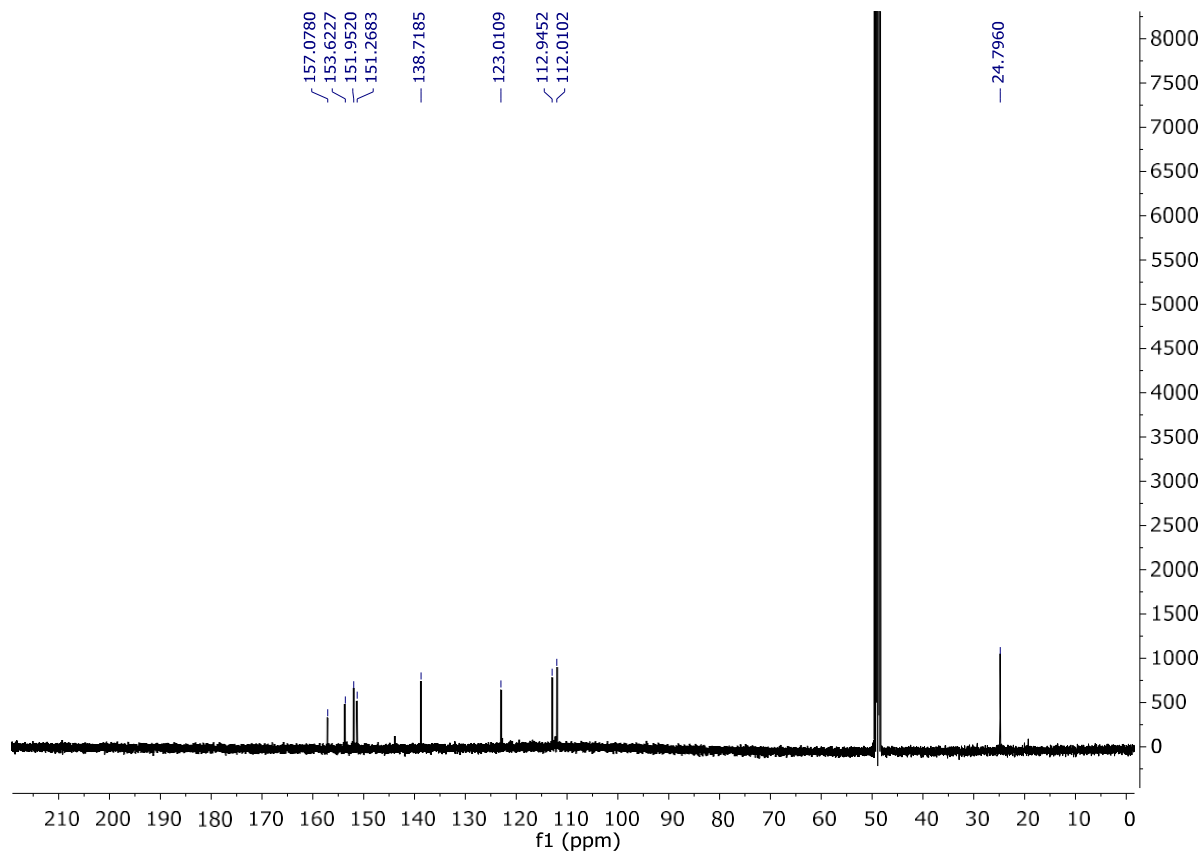

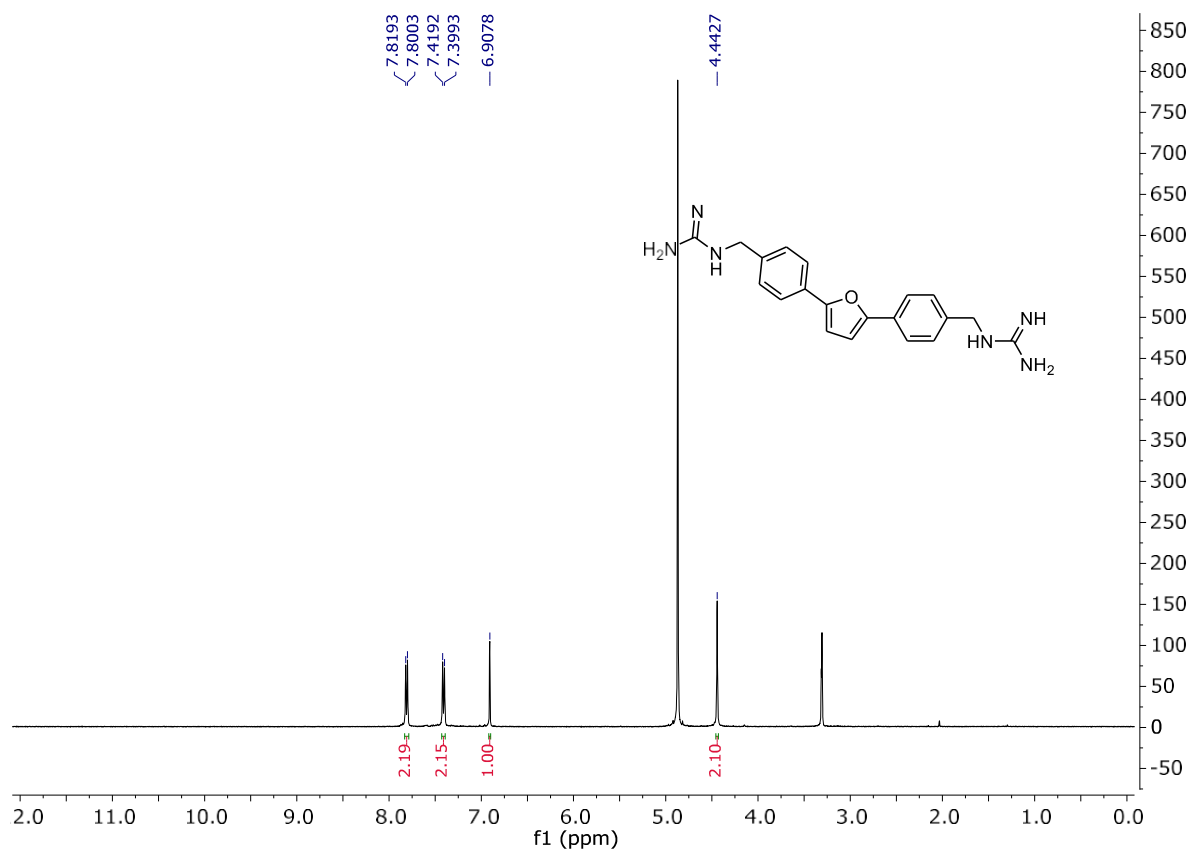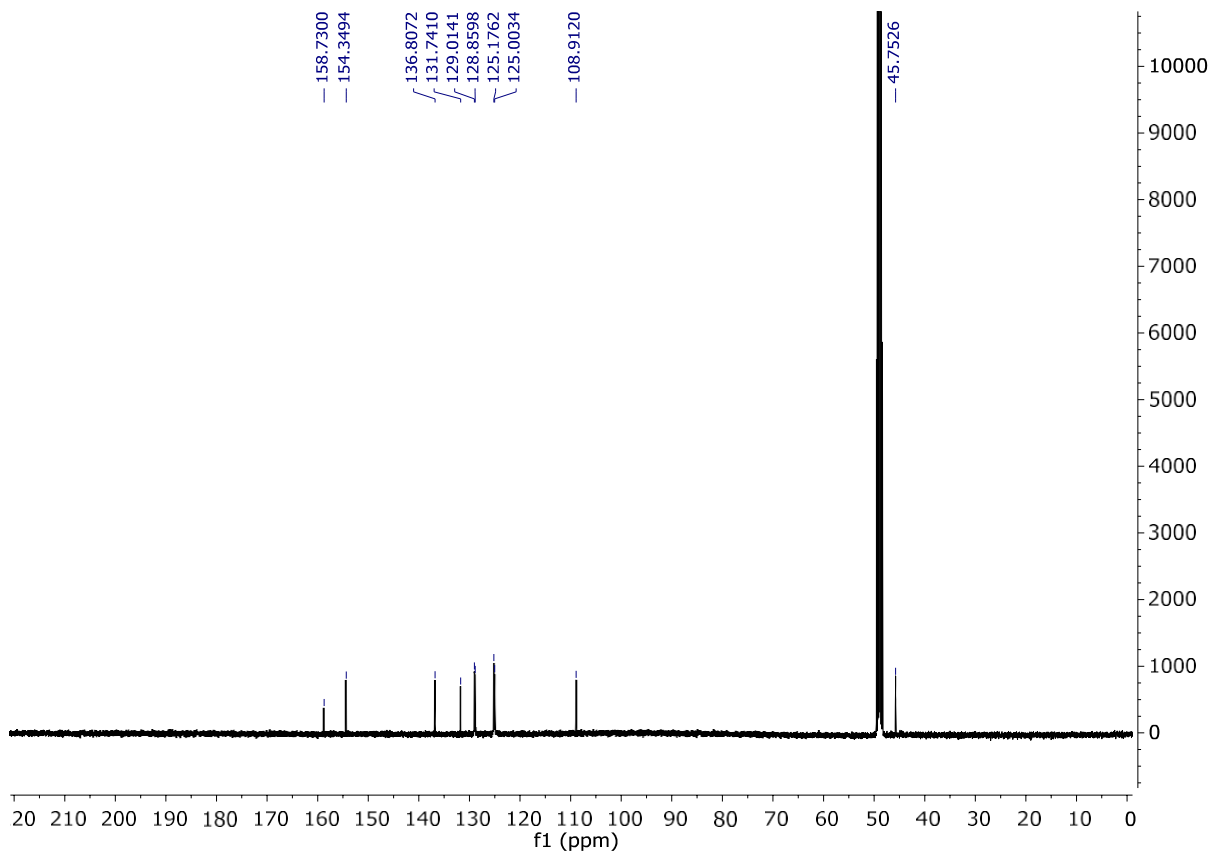



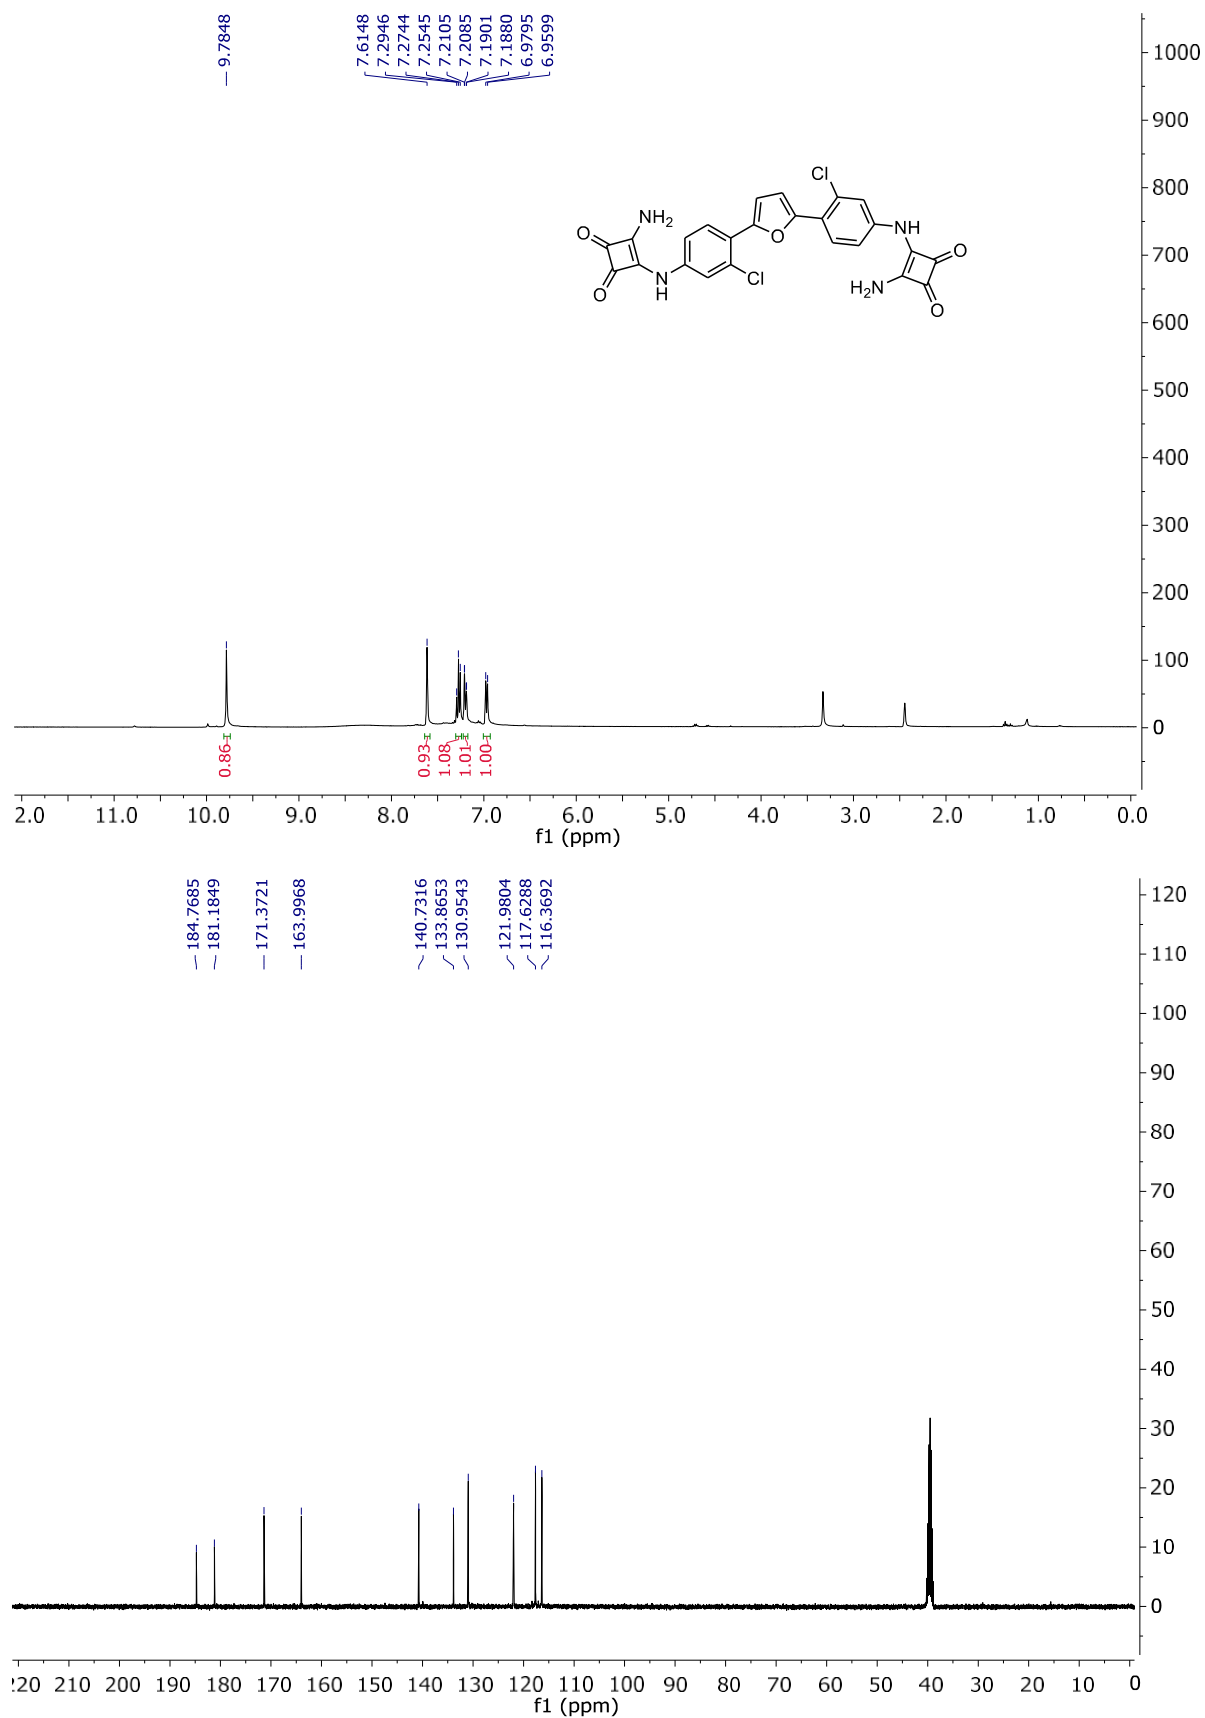

**Figure S24.** <sup>1</sup>H NMR (DMSO-d<sub>6</sub>, 400 MHz) and <sup>13</sup>C NMR (DMSO-d<sub>6</sub>, 100 MHz) spectra for 2,5-bis(2-chloro-4-((3,4-dioxo-2-(amino)cyclobut-1-en-1-yl)amino)phenyl)furan (**11**).

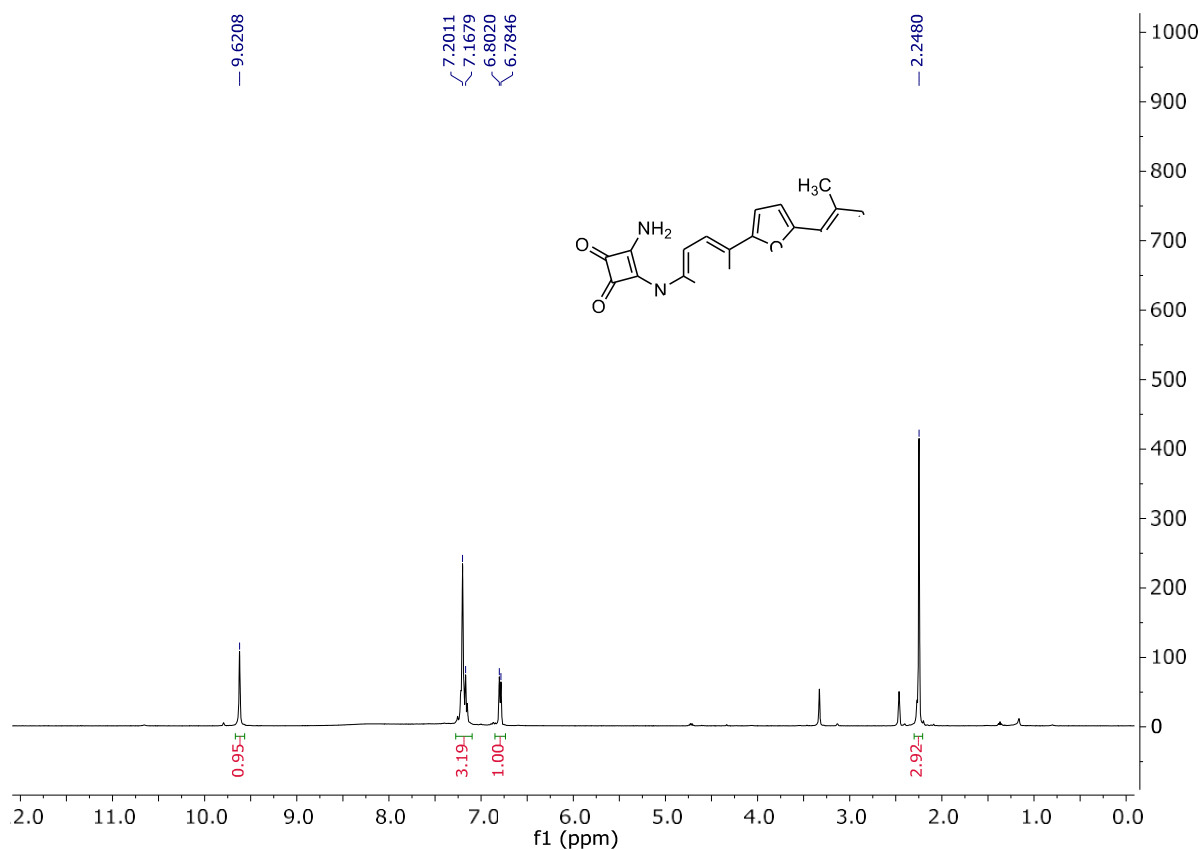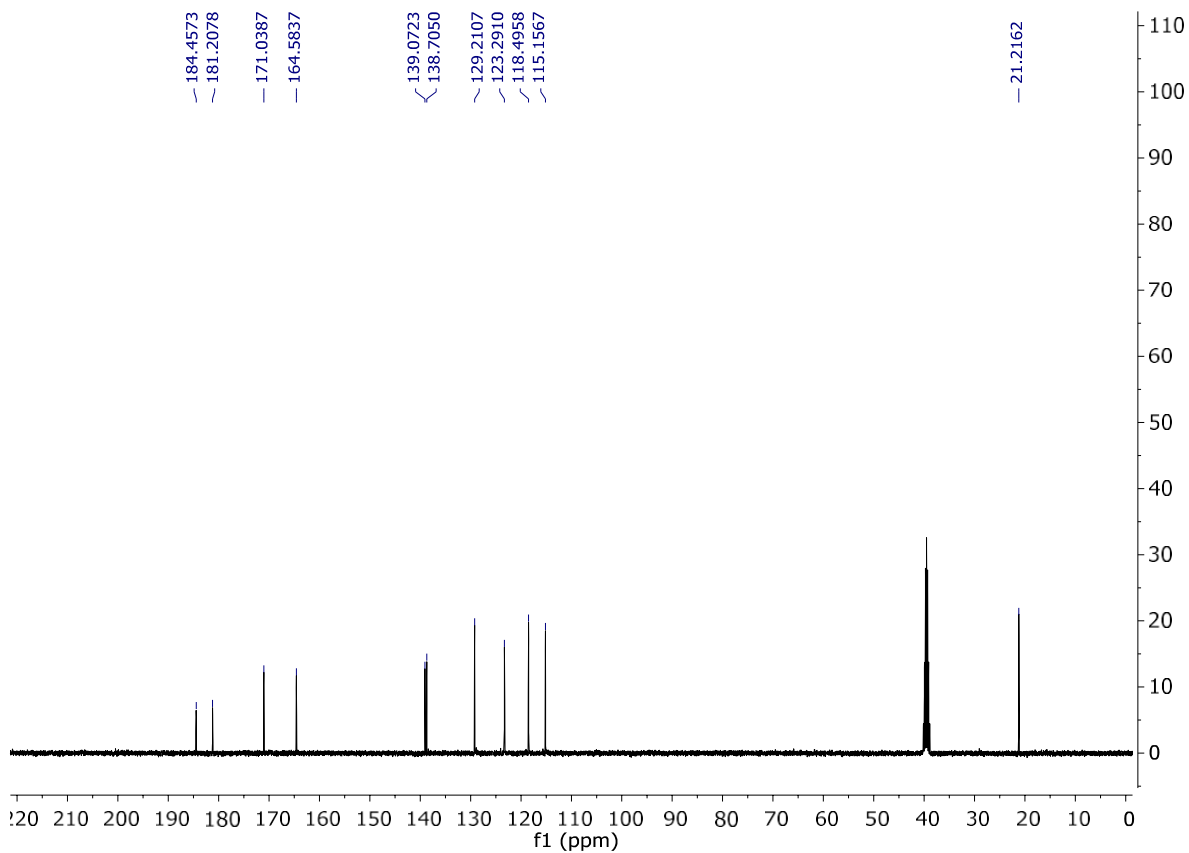

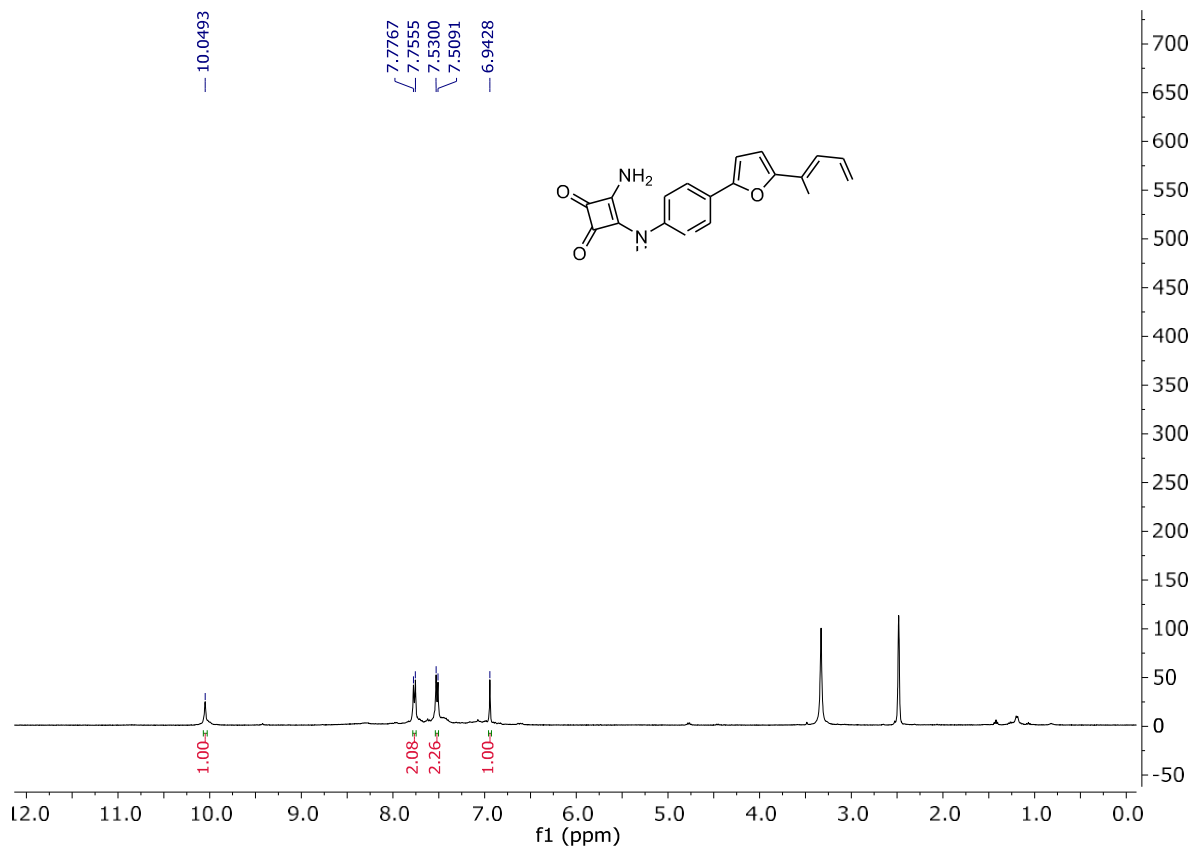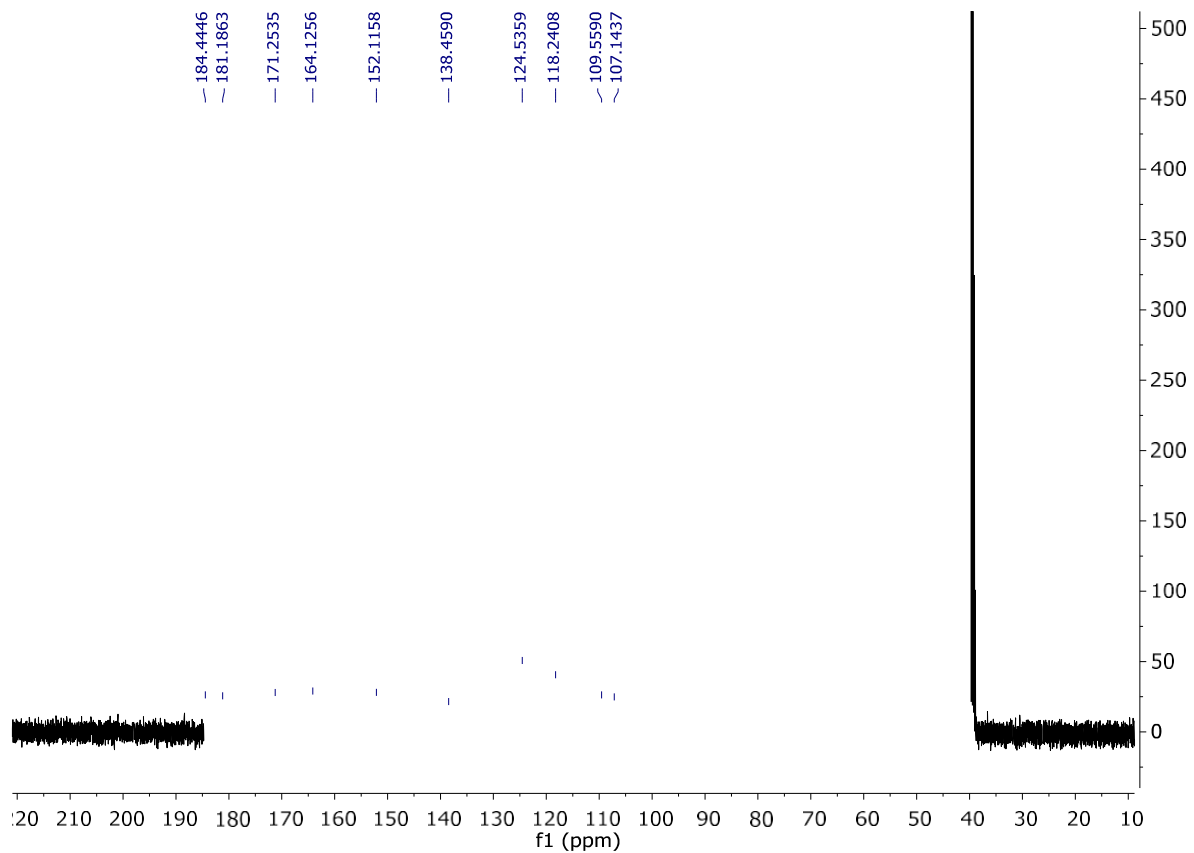

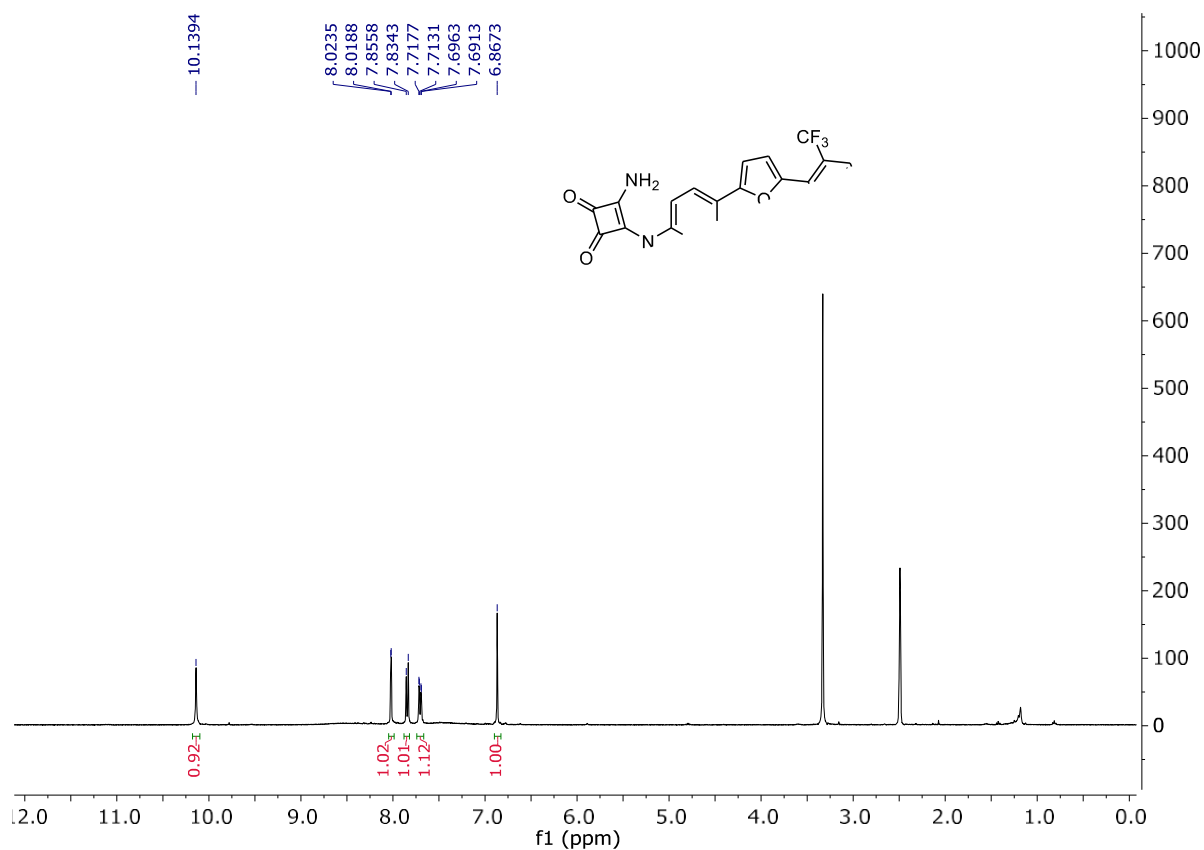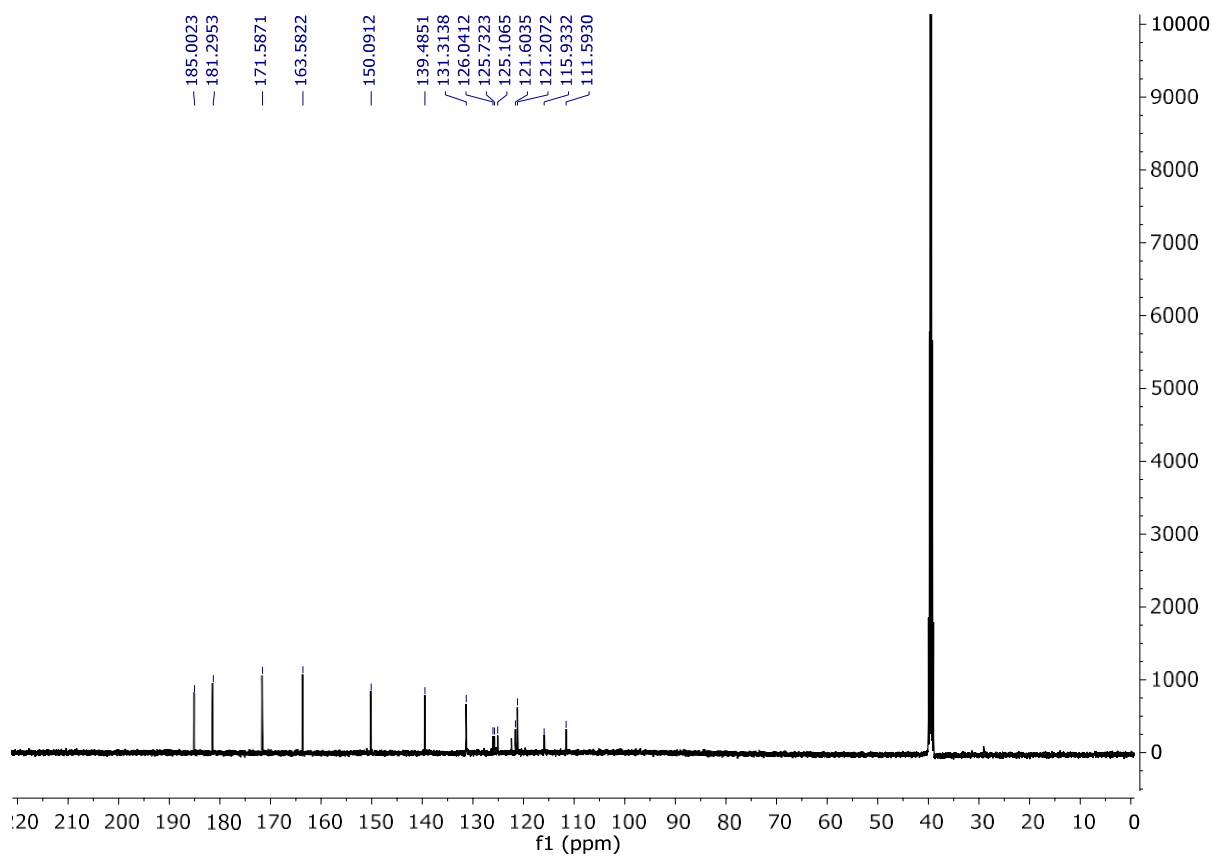

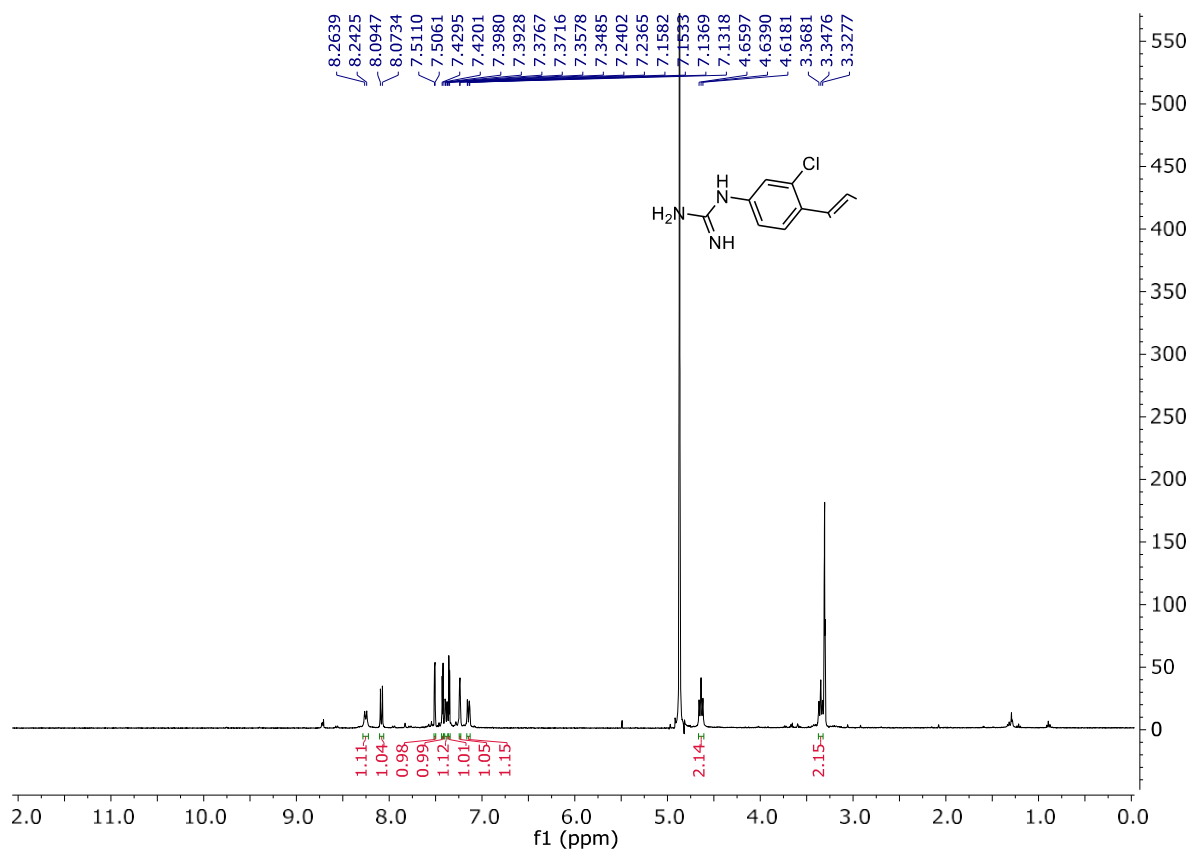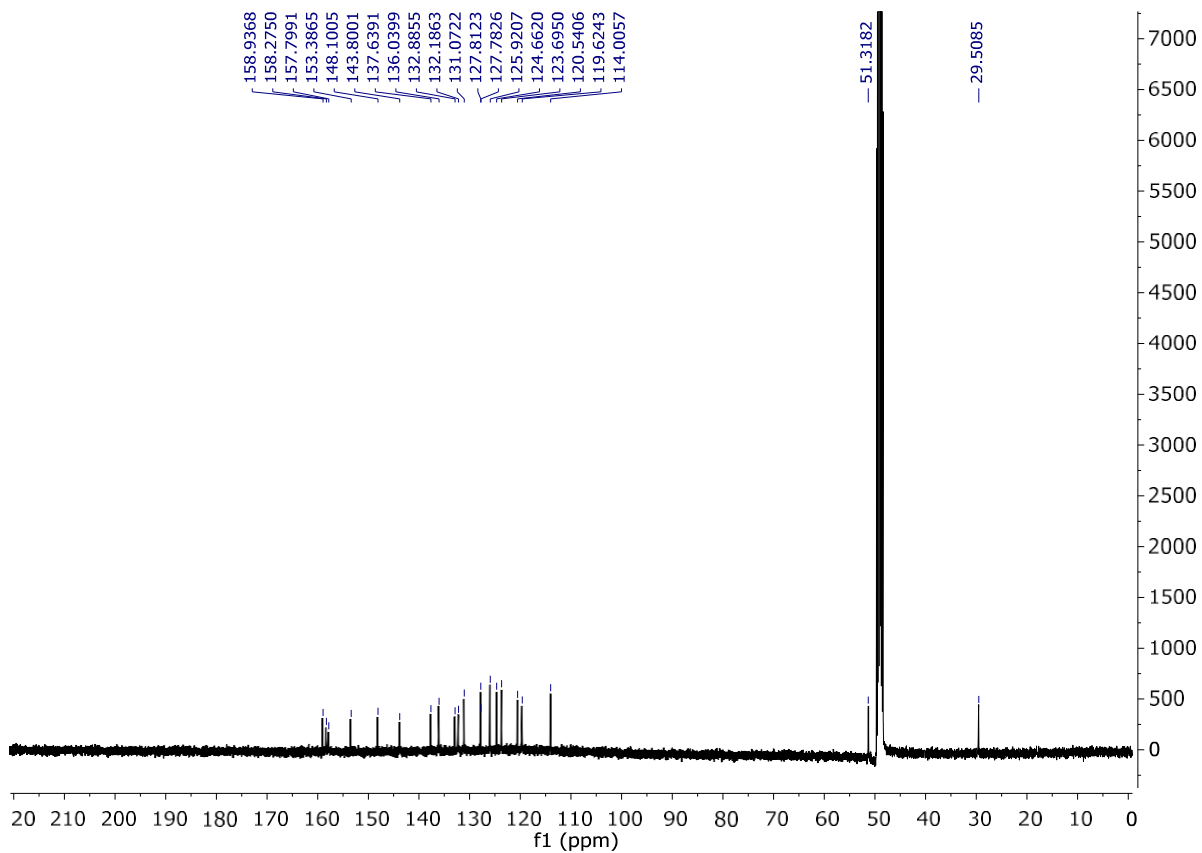

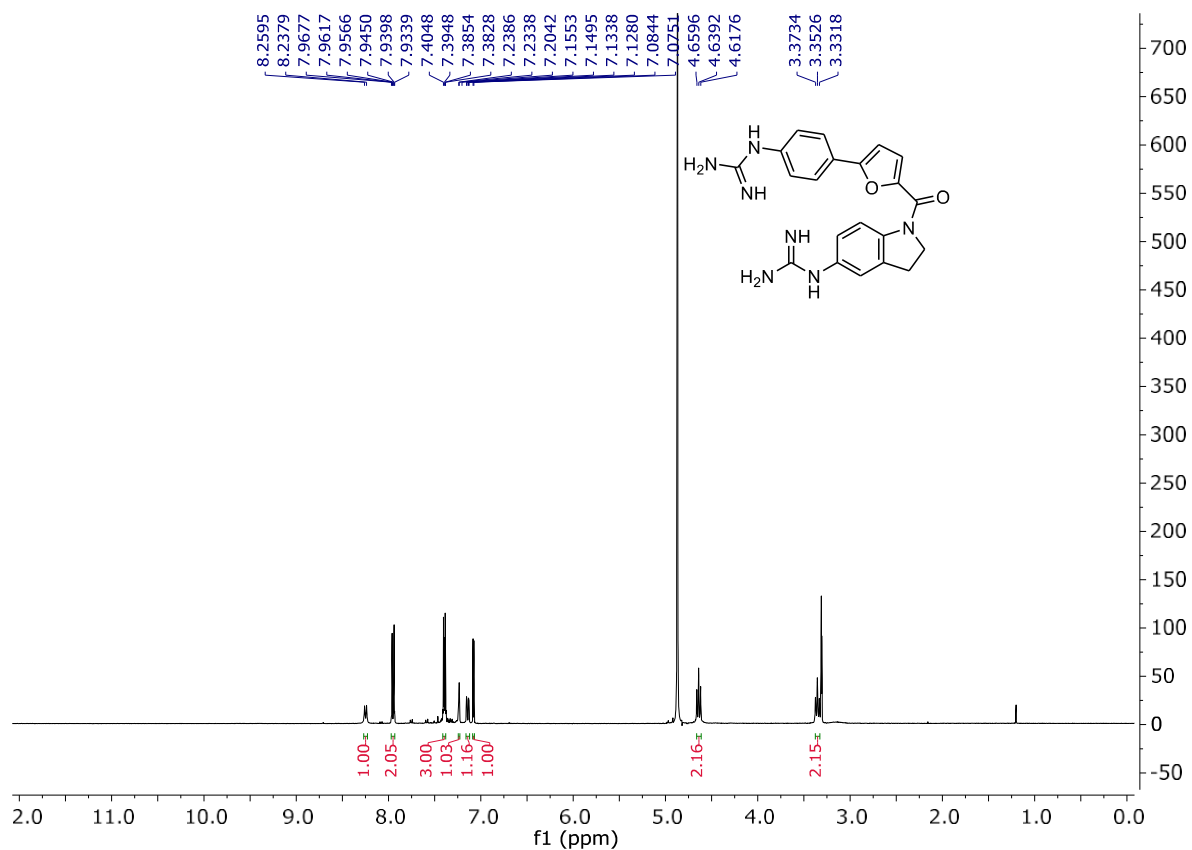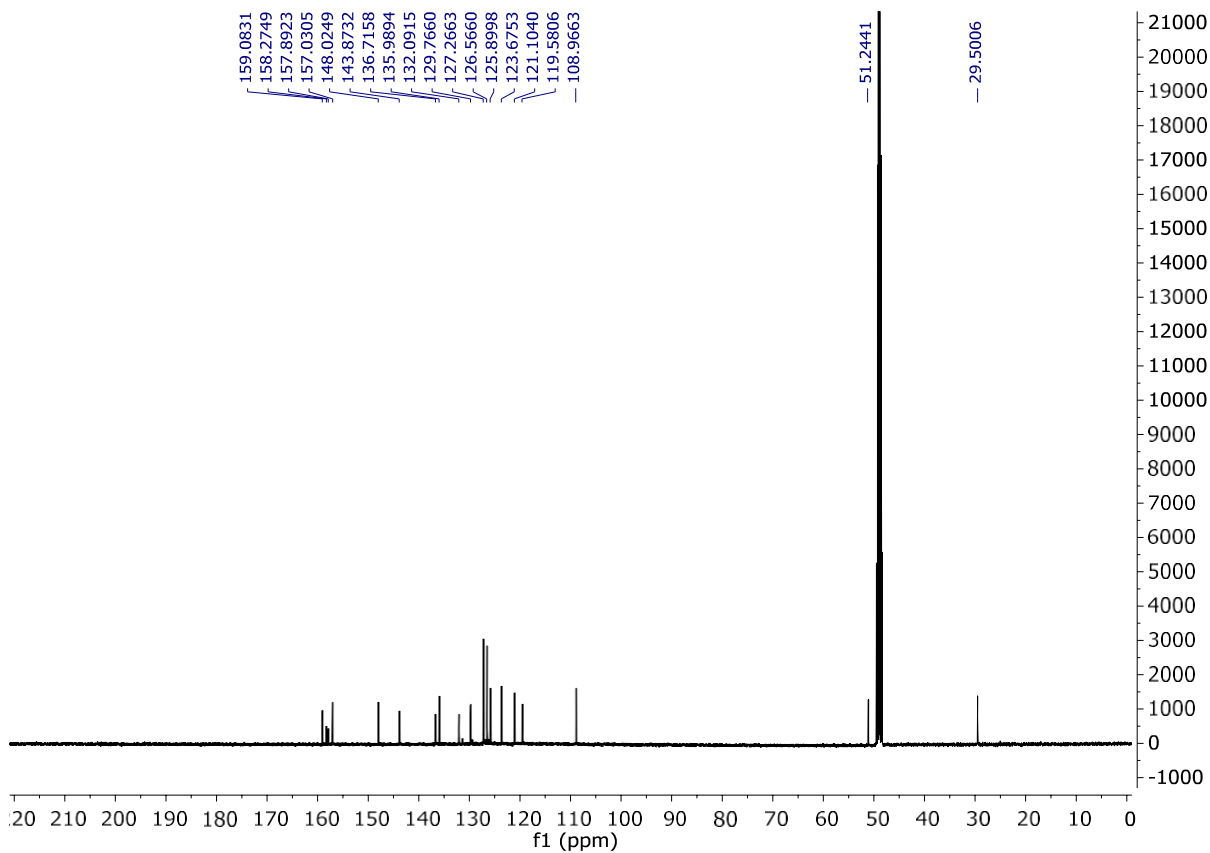

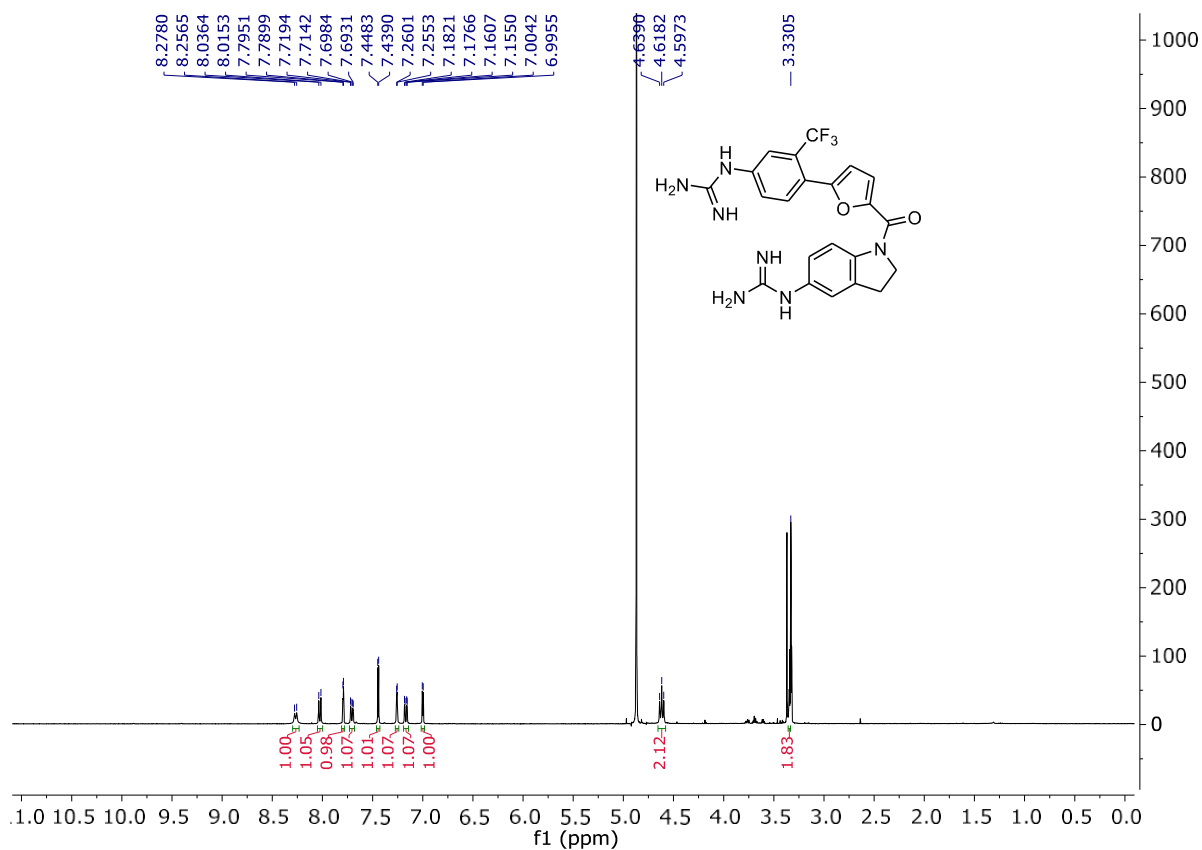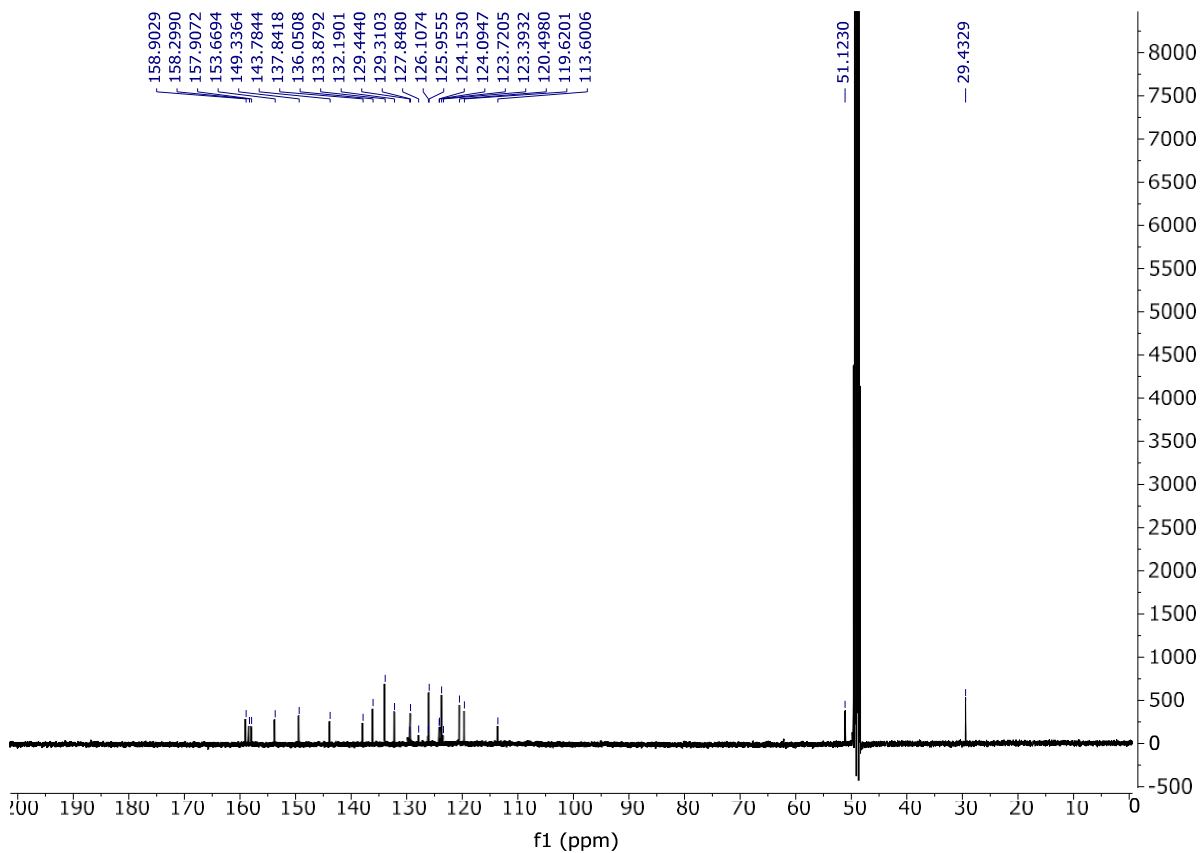

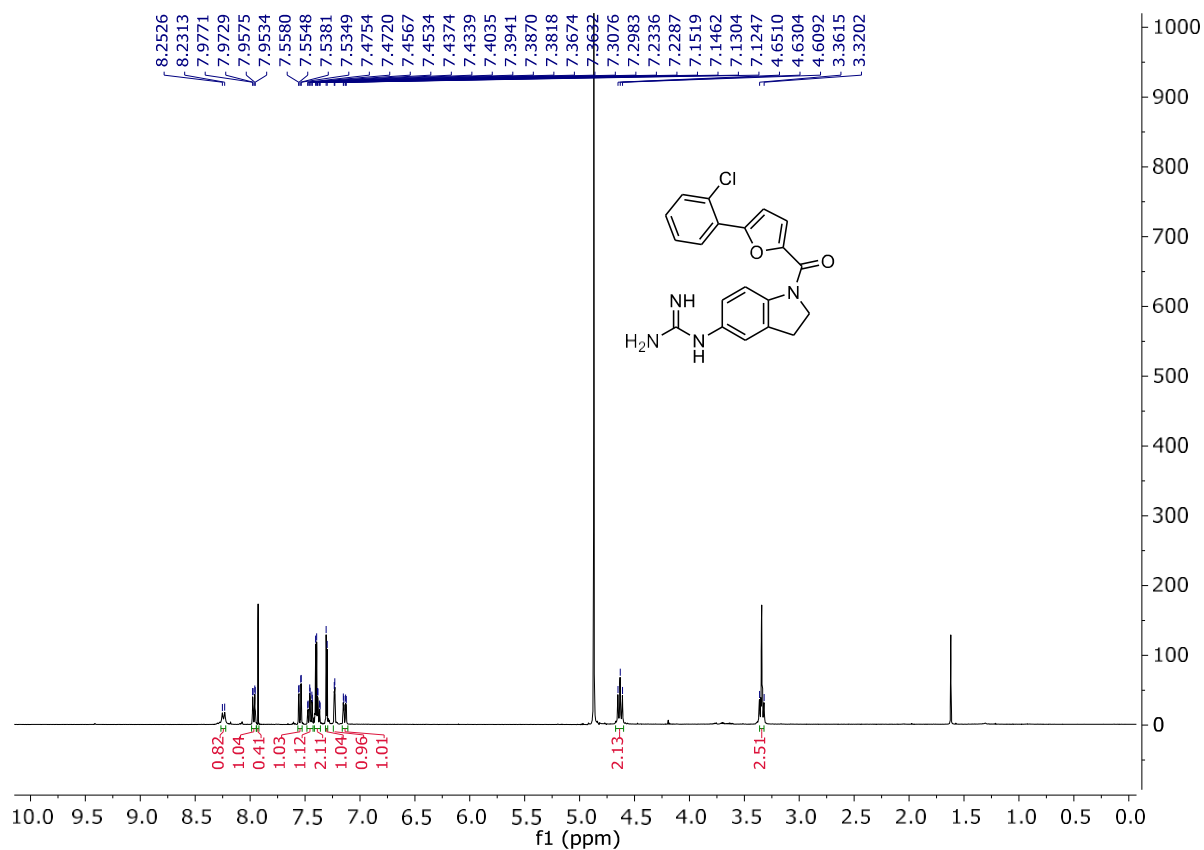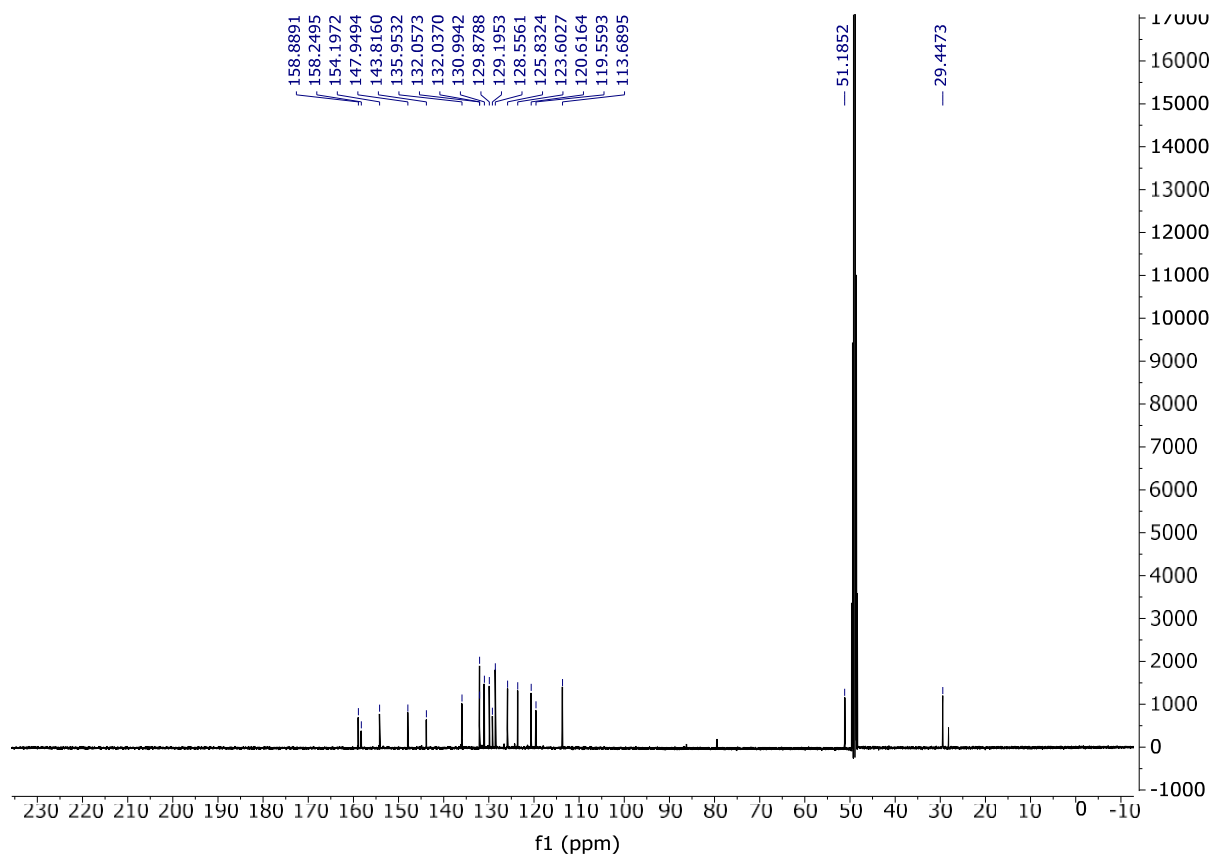



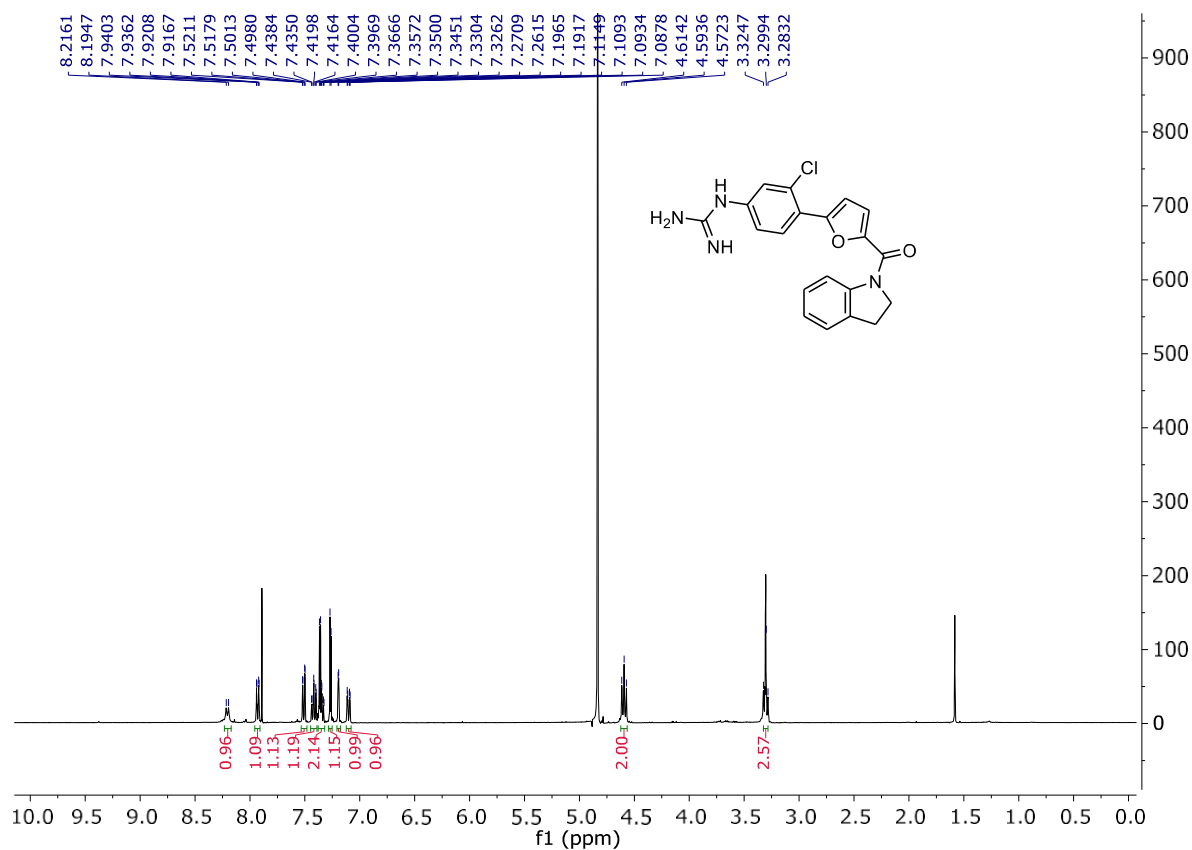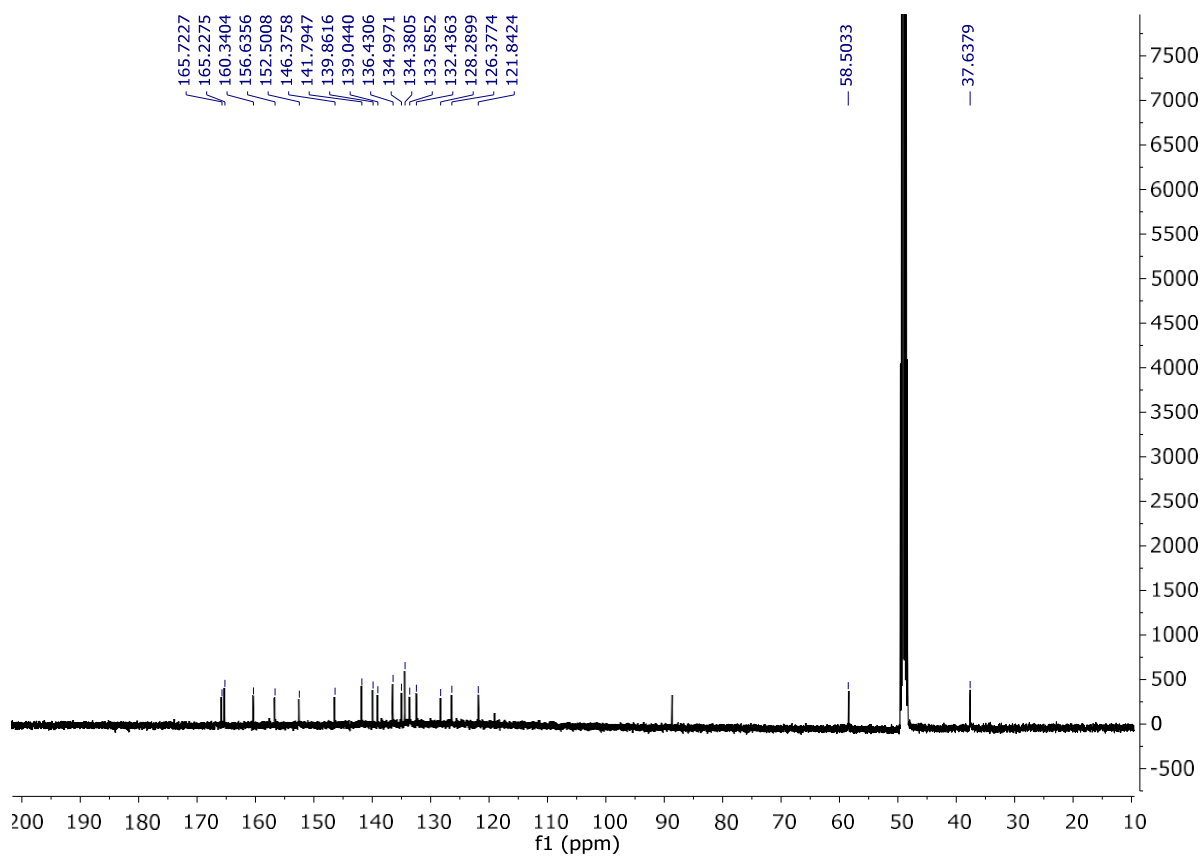

Supplement: s1 [file s1]
